# Supplementary material for: How Simple Hypothetical-Choice Experiments Can Be Utilized to Learn Humans’ Navigational Escape Decisions in Emergencies
Source: PubMed Central journal article supplement (PMC5117746; doi:10.1371/journal.pone.0166908), 2016-11-21
Supplement: pone.0166908.s001.pdf [file pone.0166908.s001.pdf]

# Hypothetical choice experiment scenarios

SC (I) scenarios - Block (I)

## Scenario 1

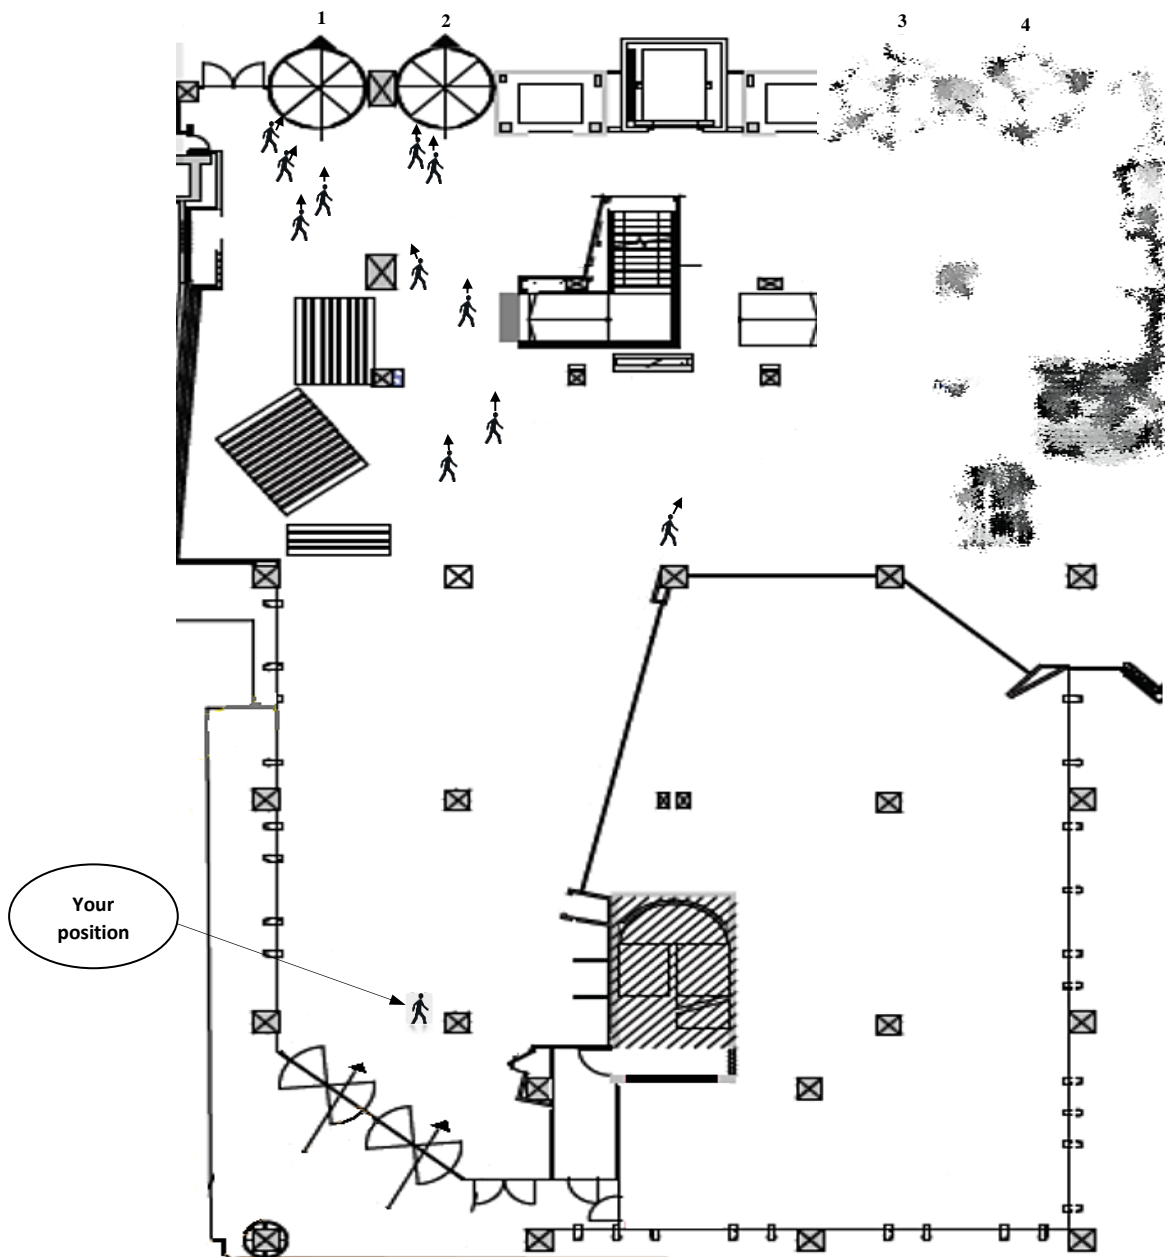

Your Choice:

Exit 1

Exit 2

Exit 3

Exit 4

## Scenario 2

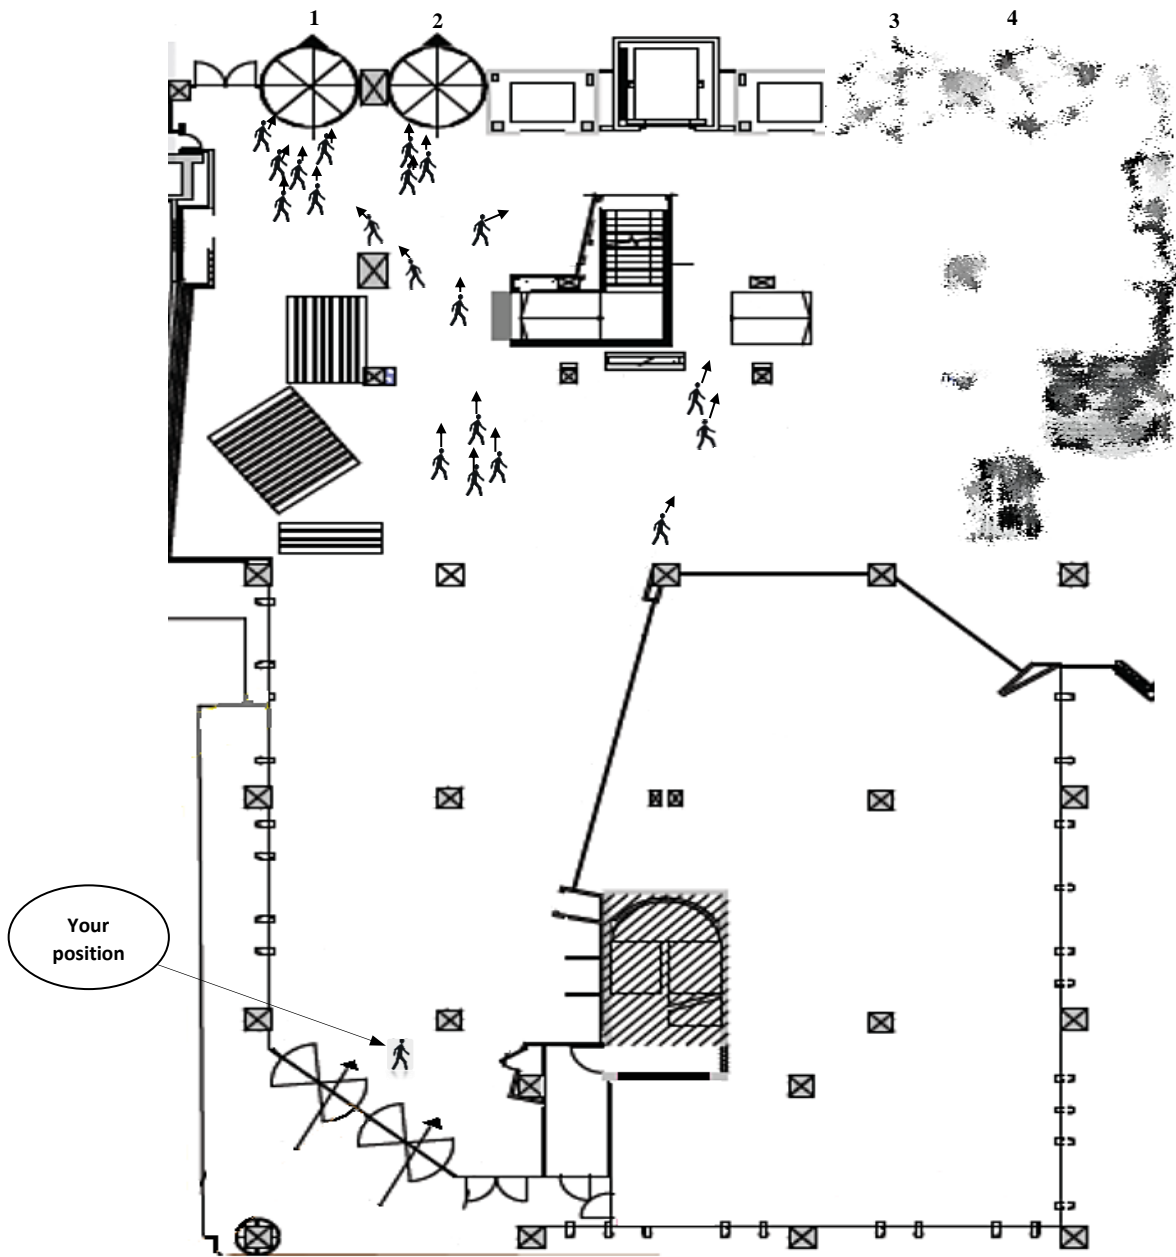

Your Choice:

Exit 1

Exit 2

Exit 3

Exit 4

### Scenario 3

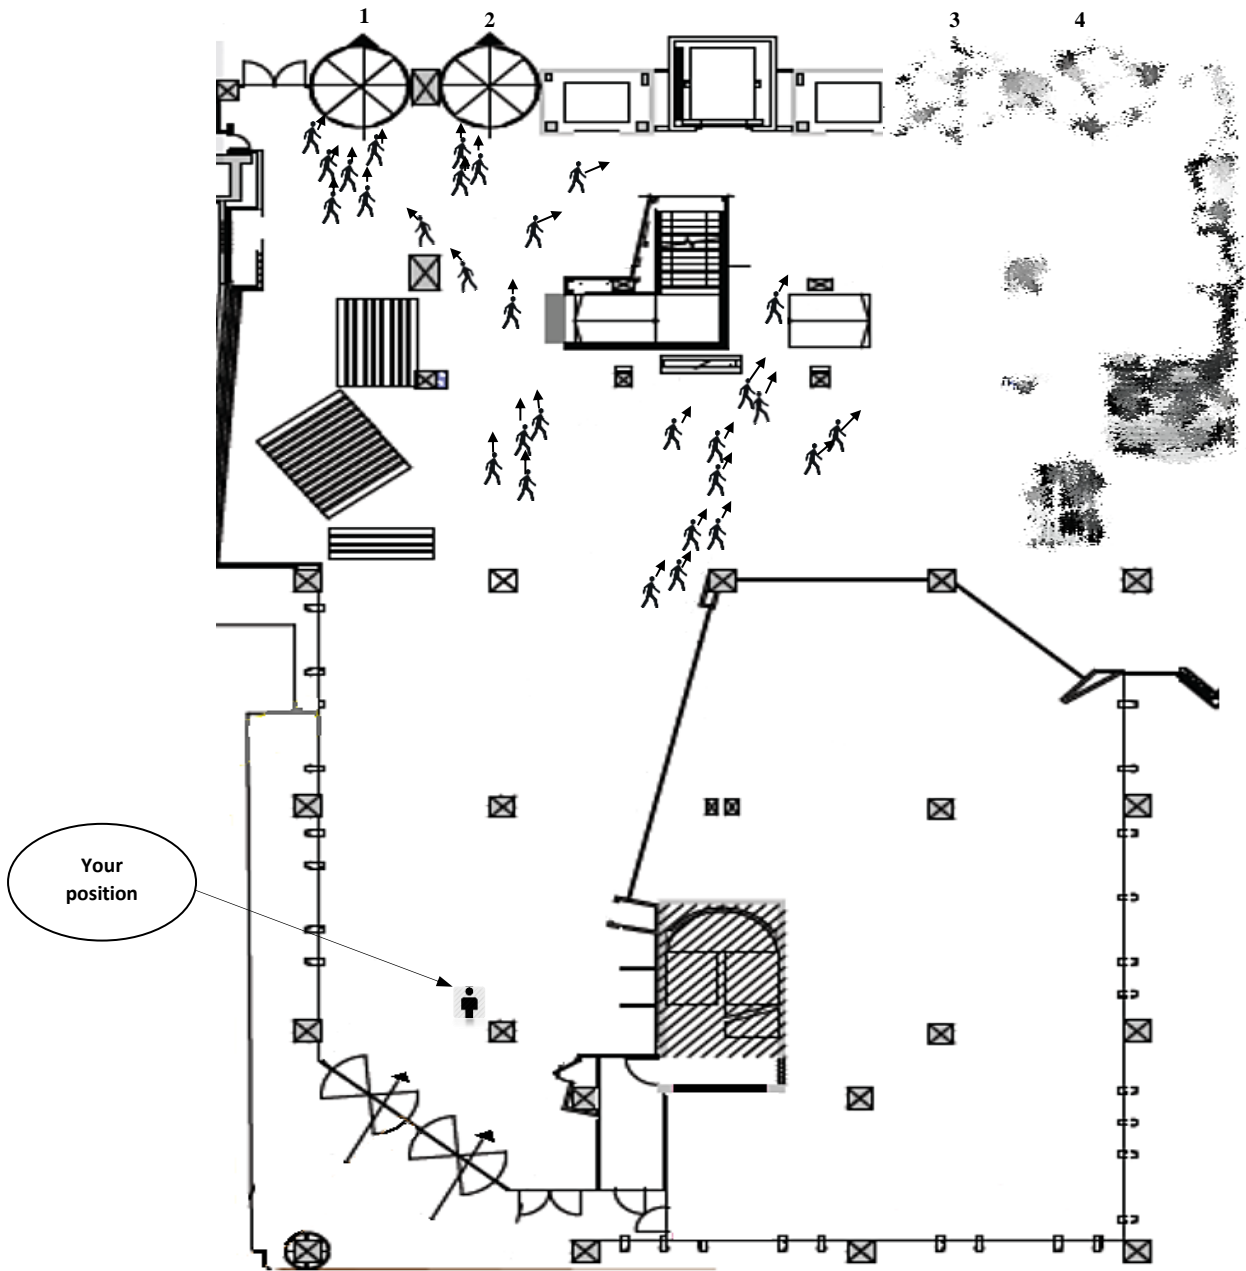

Your Choice:

Exit 1

Exit 2

Exit 3

Exit 4

### Scenario 4

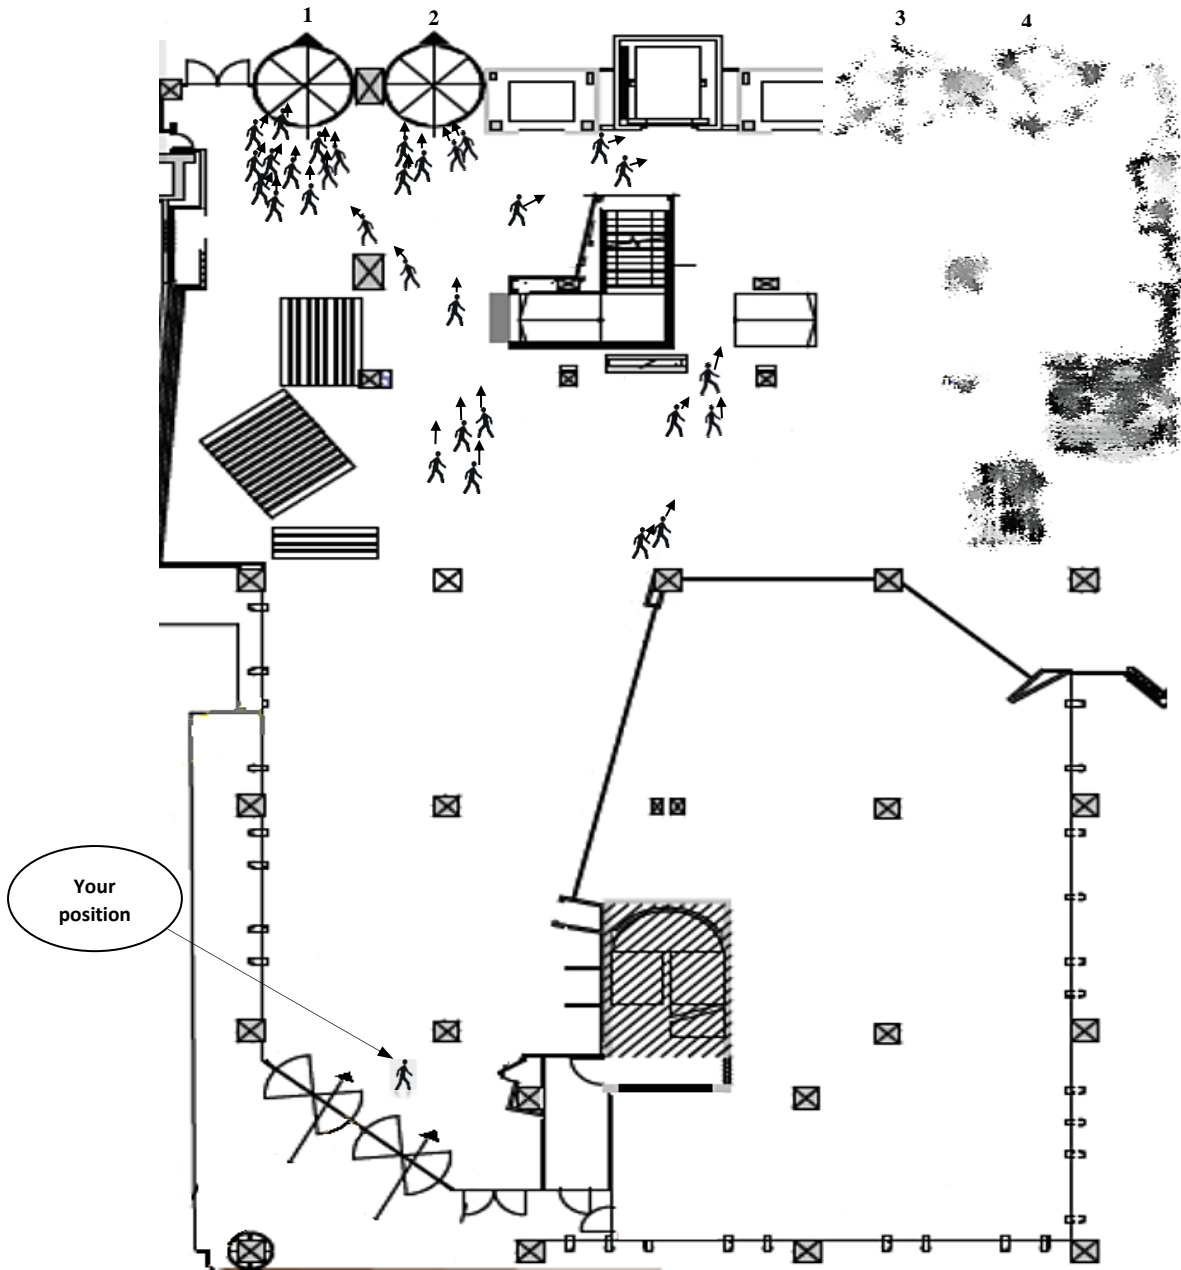

Your Choice:

Exit 1

Exit 2

Exit 3

Exit 4

### Scenario 5

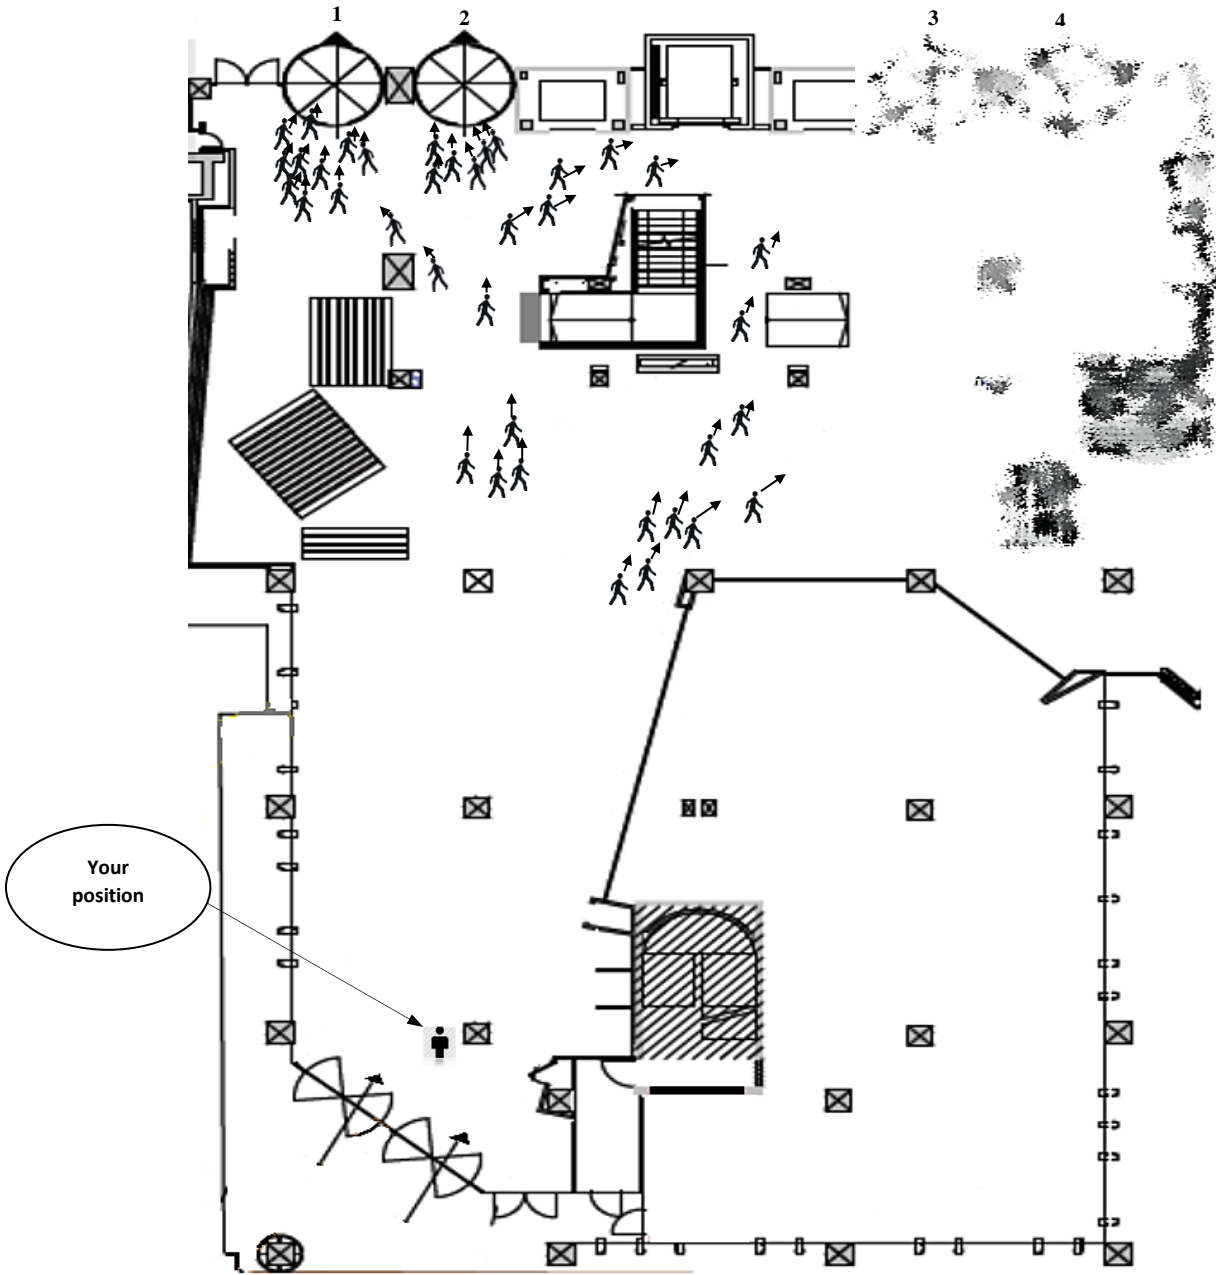

Your Choice:

Exit 1

Exit 2

Exit 3

Exit 4

### Scenario 6

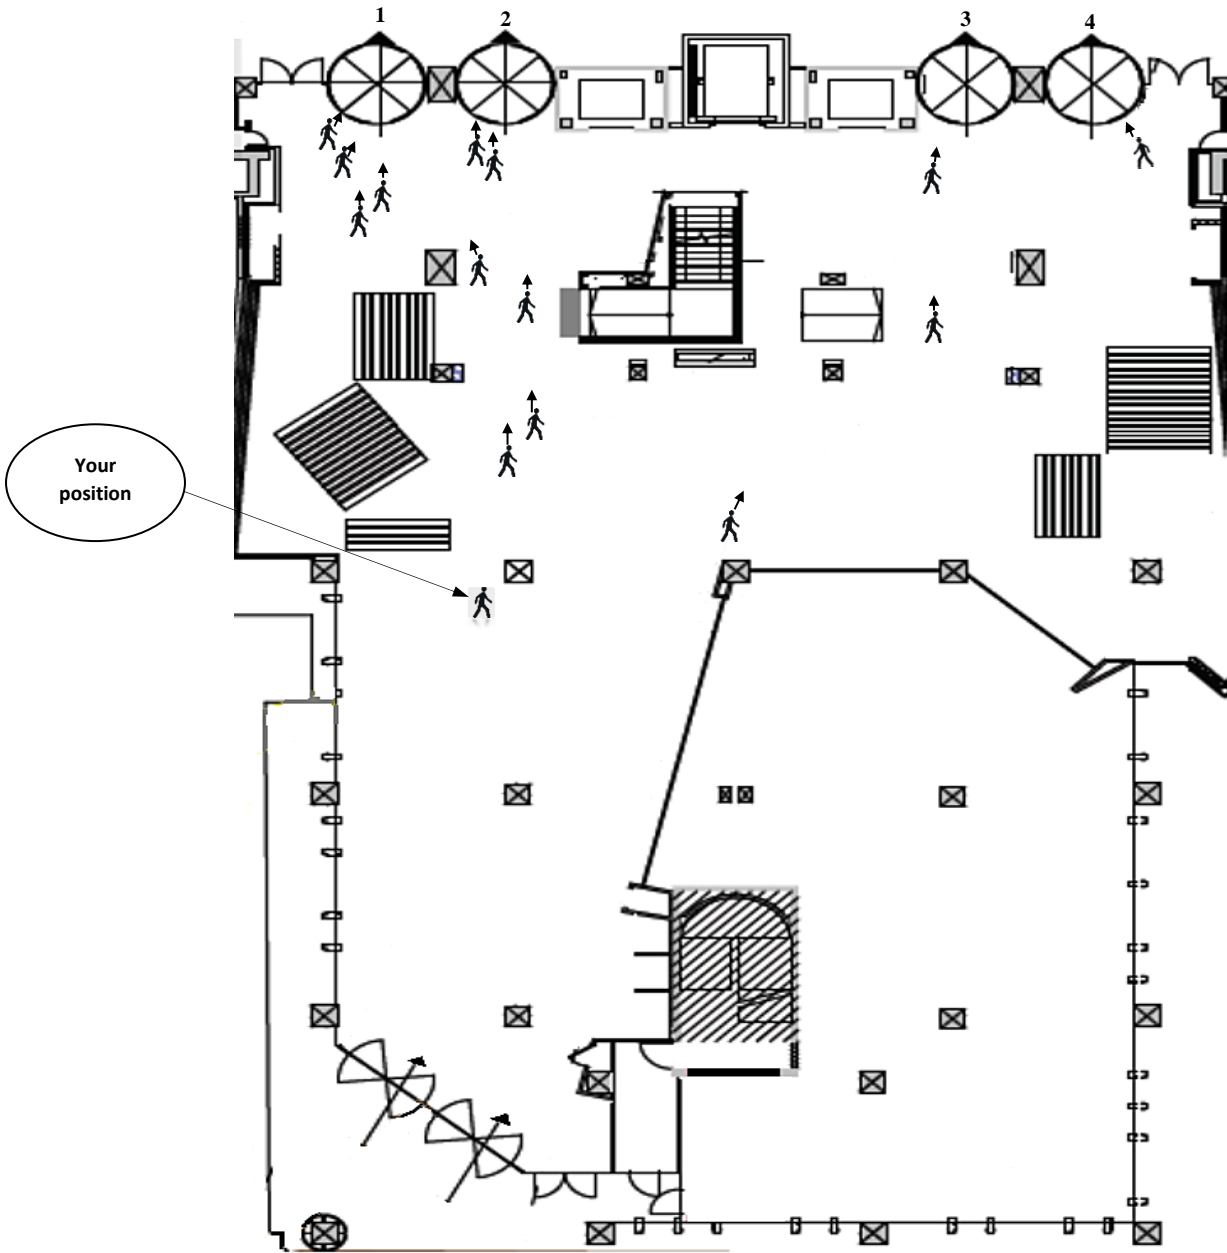

Your Choice:

Exit 1

Exit 2

Exit 3

Exit 4

### Scenario 7

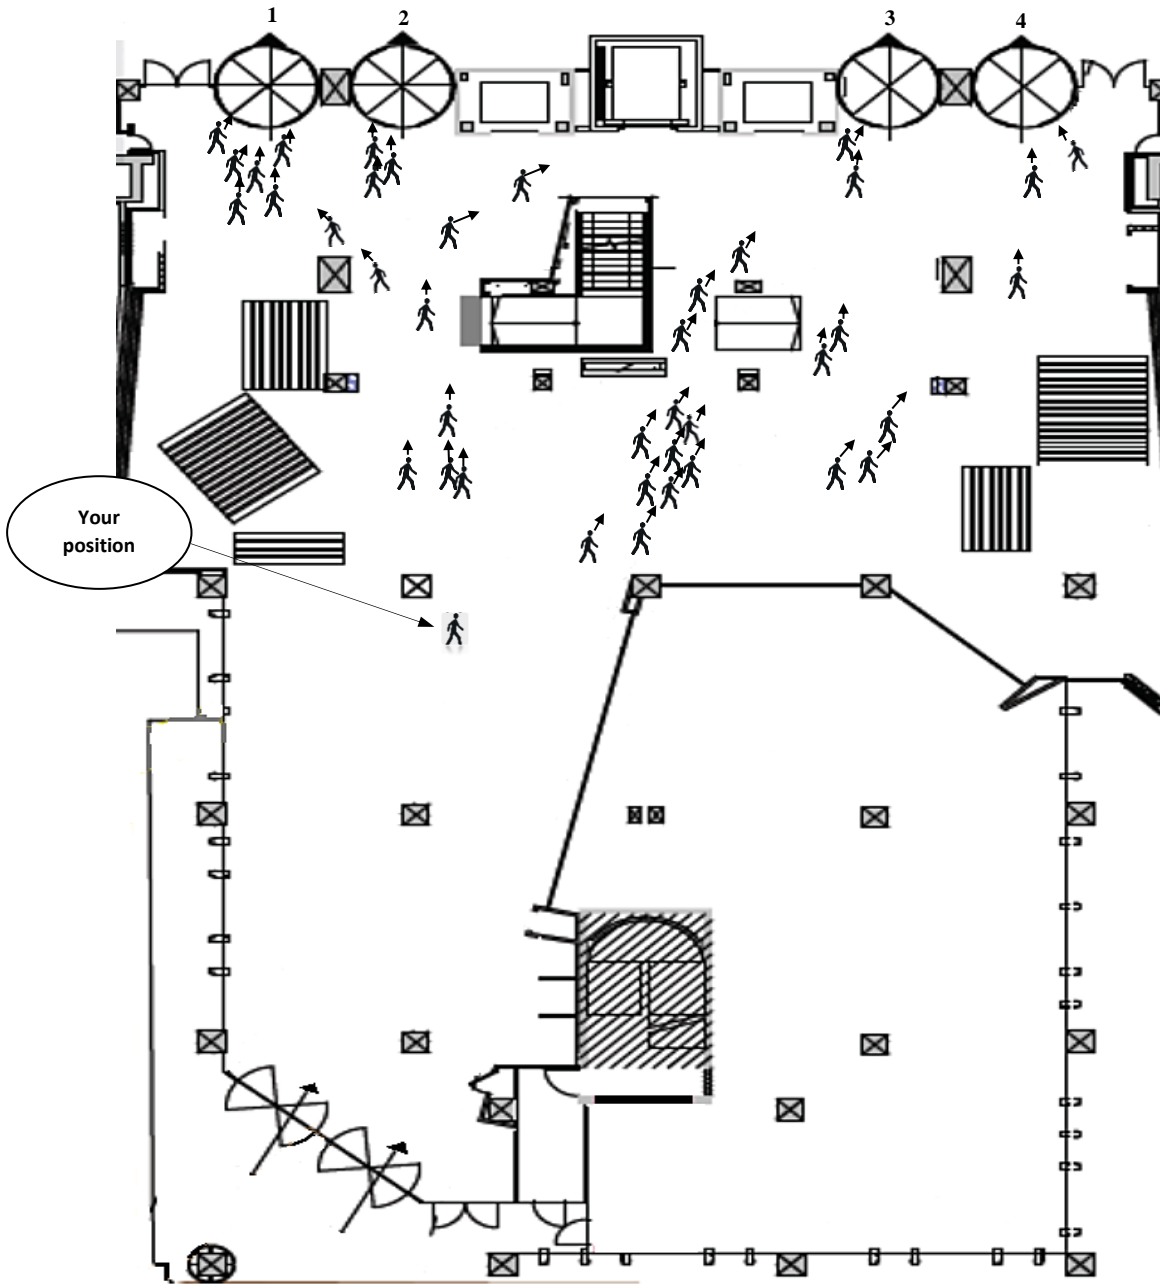

Your Choice:

Exit 1

Exit 2

Exit 3

Exit 4

### Scenario 8

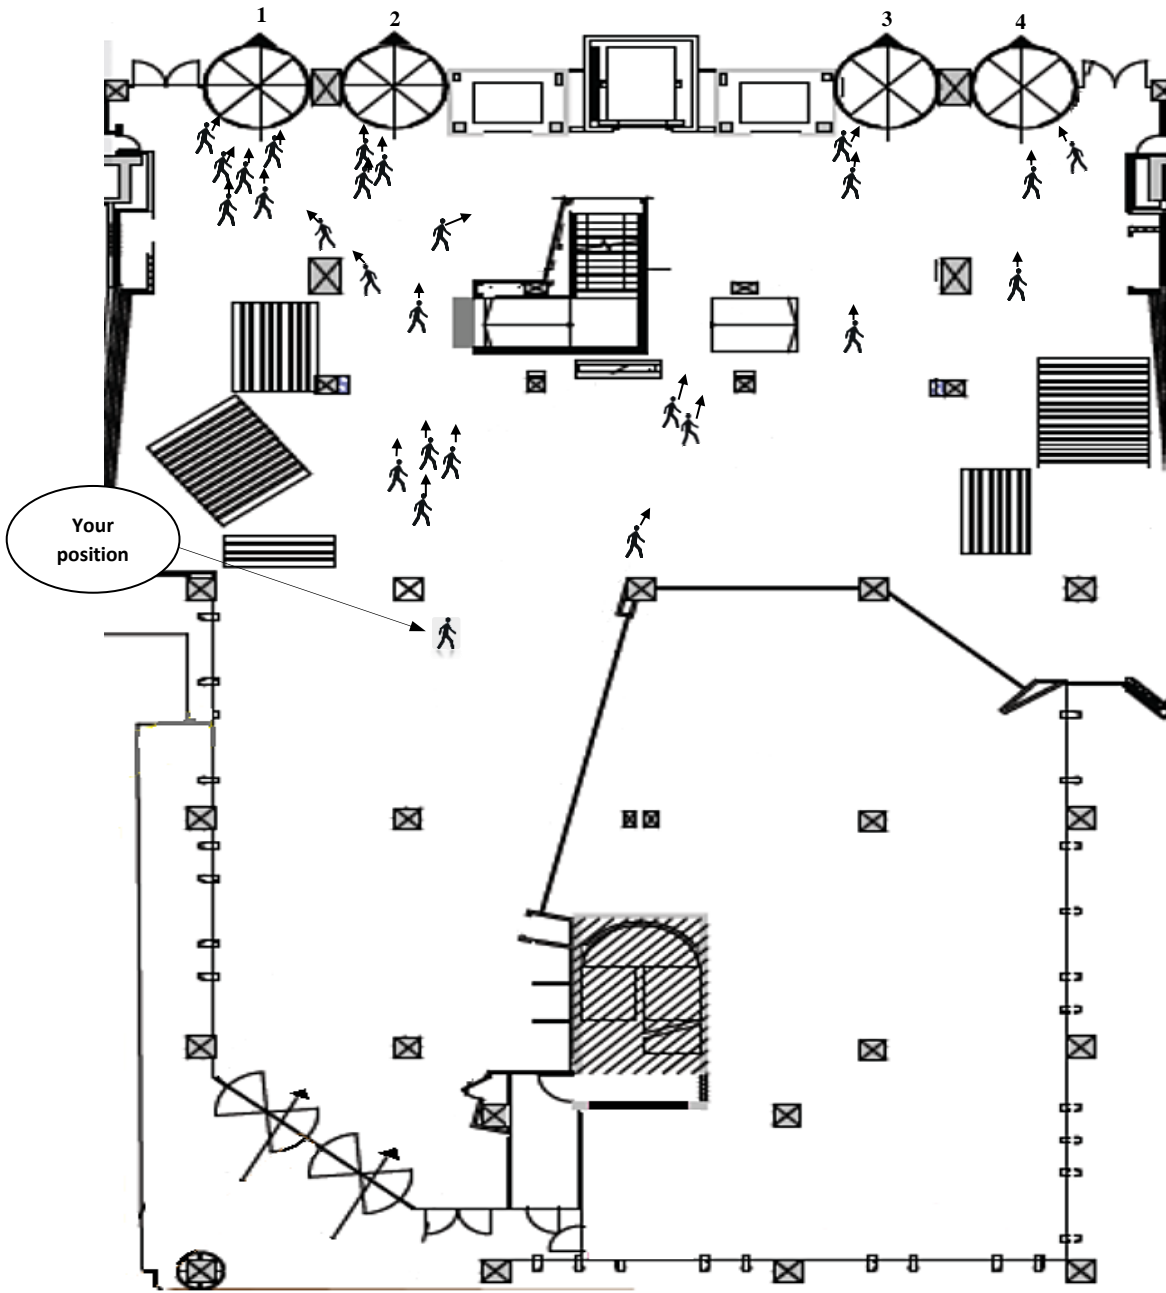

Your Choice:

Exit 1

Exit 2

Exit 3

Exit 4



### Scenario 9

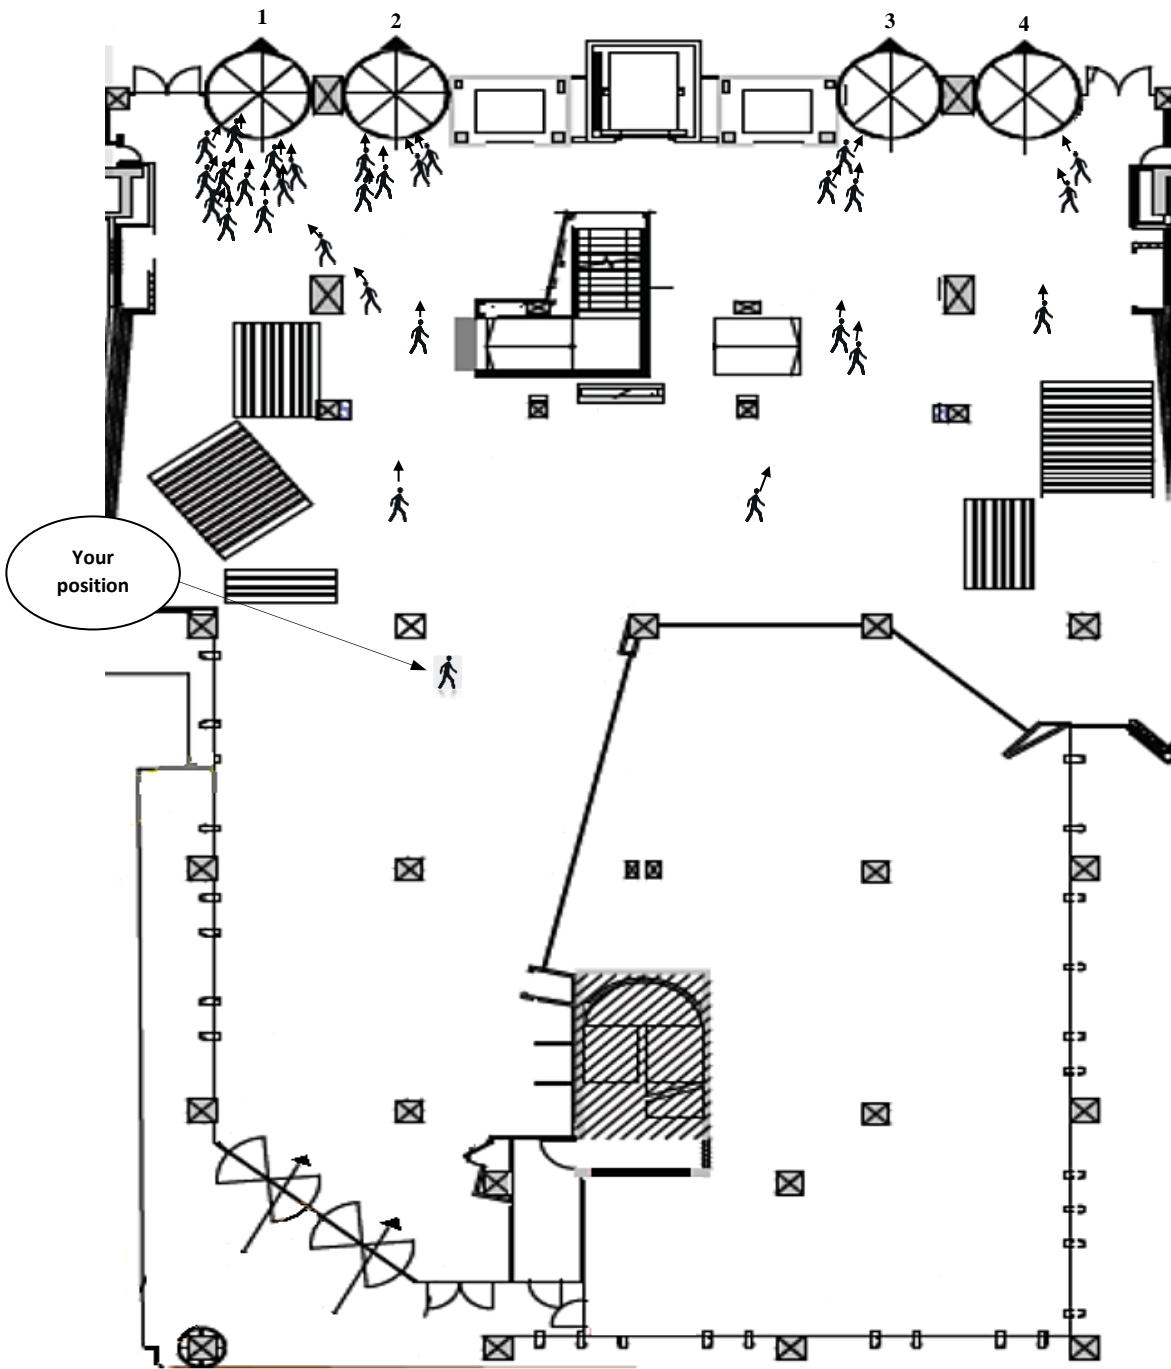

Your Choice:

Exit 1

Exit 2

Exit 3

Exit 4

### Scenario 10

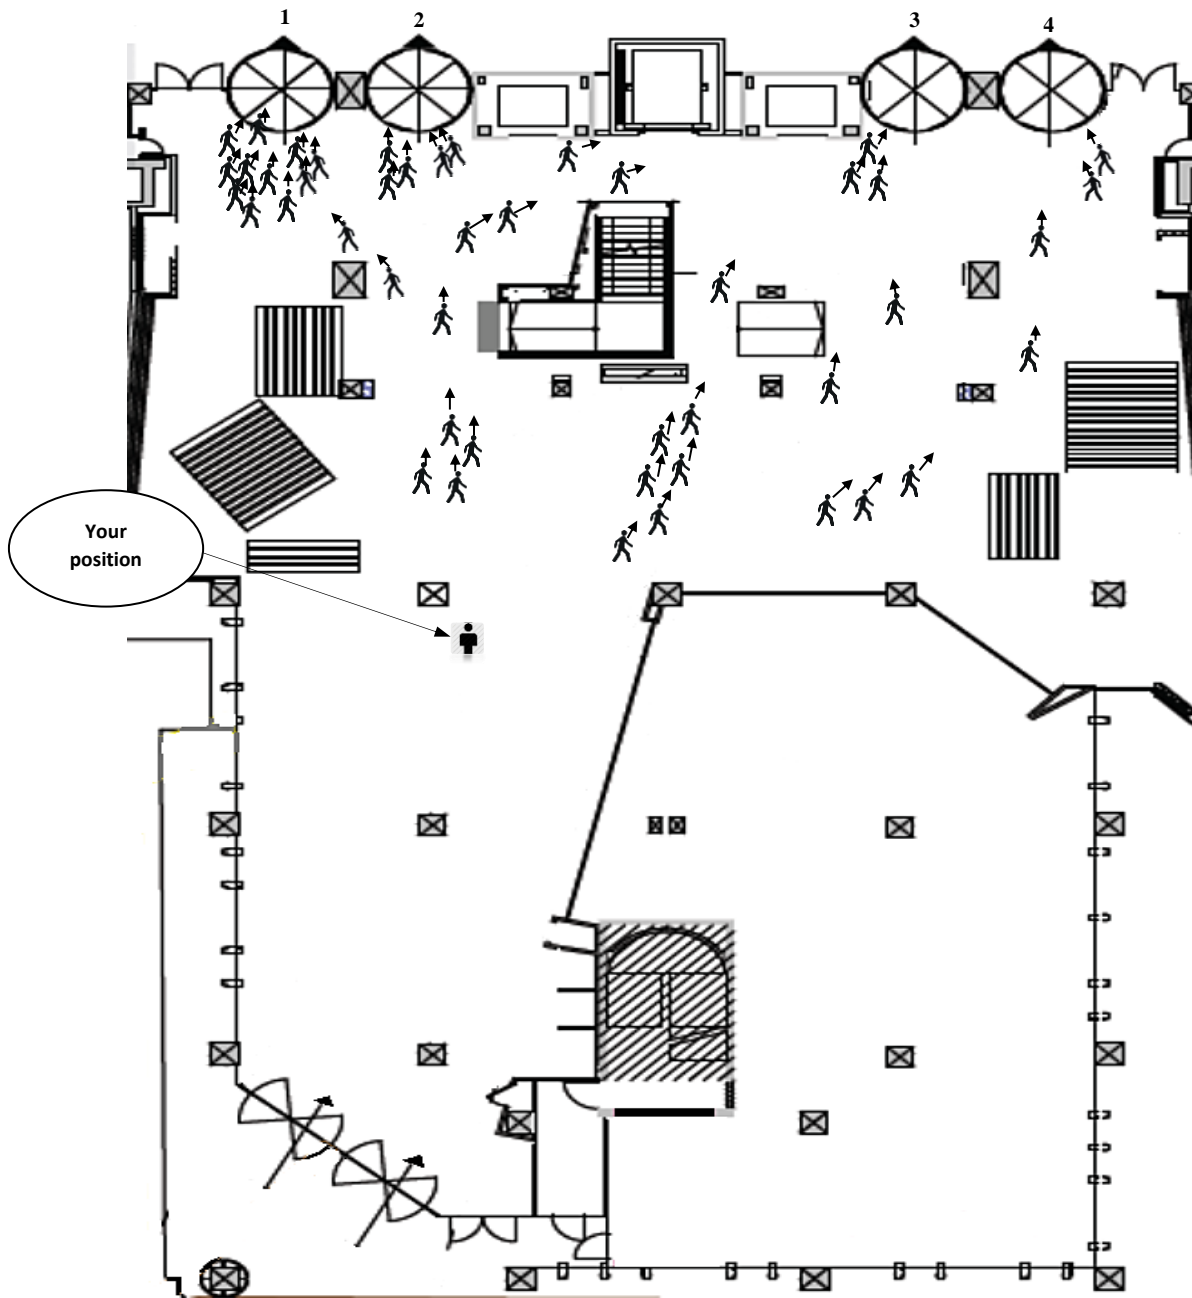

Your Choice:

Exit 1

Exit 2

Exit 3

Exit 4

### Scenario 11

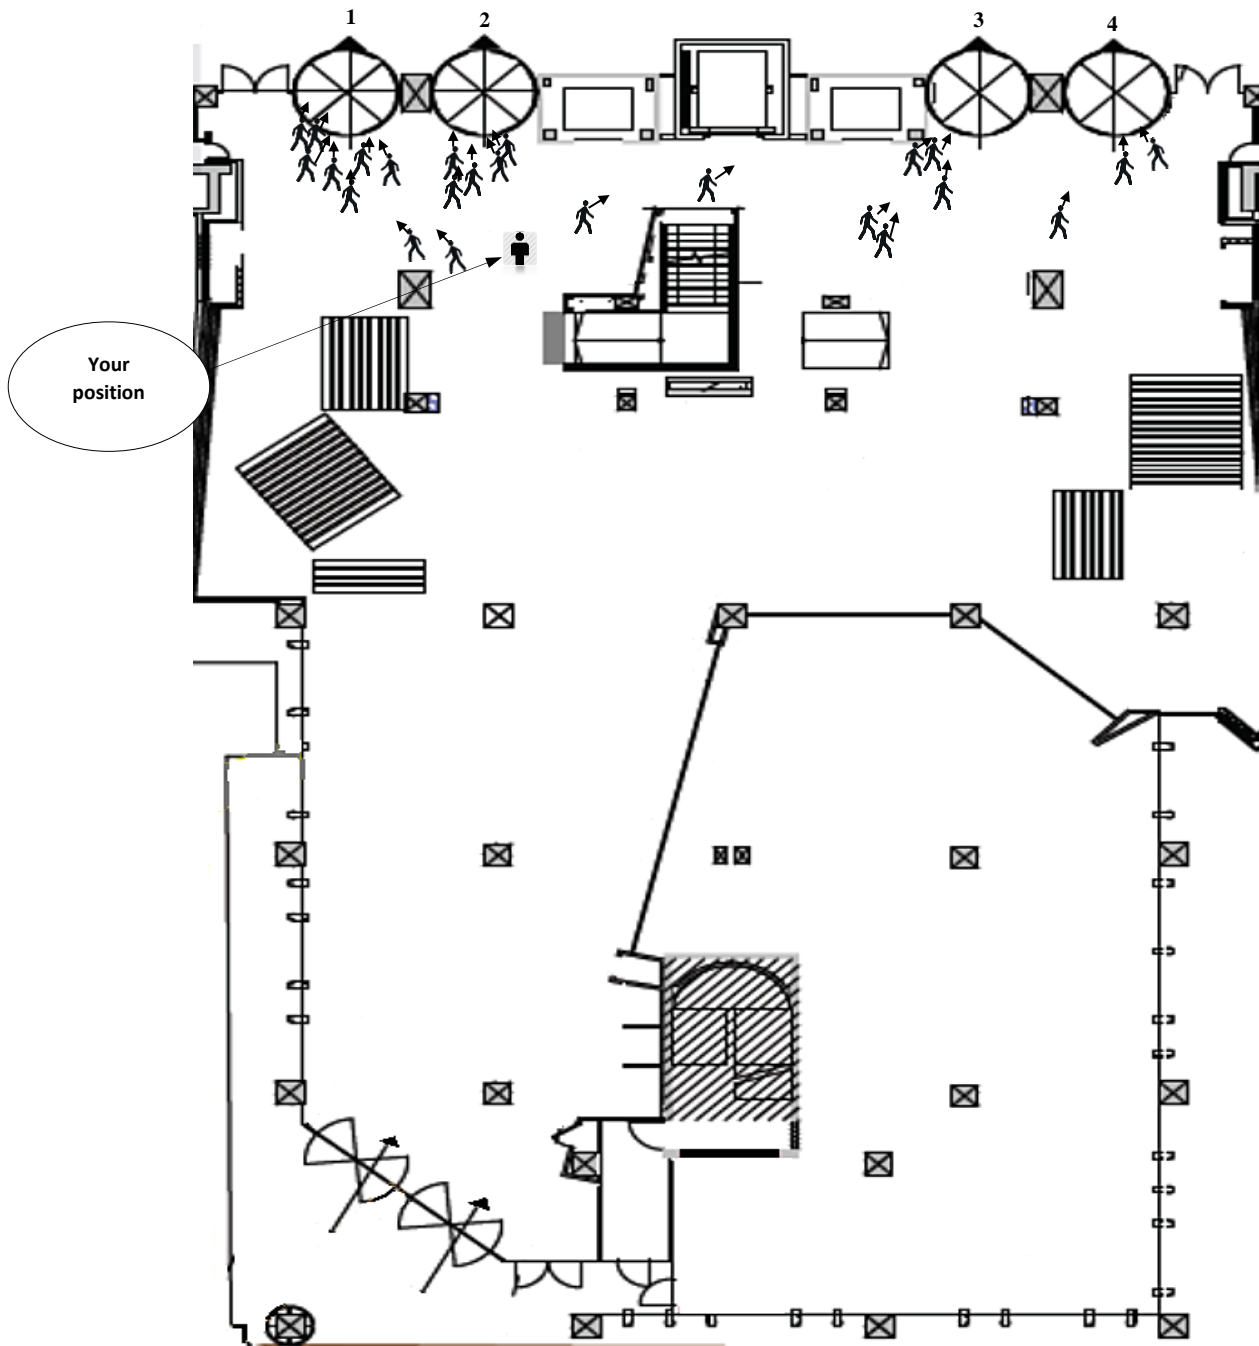

Your Choice:

Exit 1

Exit 2

Exit 3

Exit 4

### Scenario 12

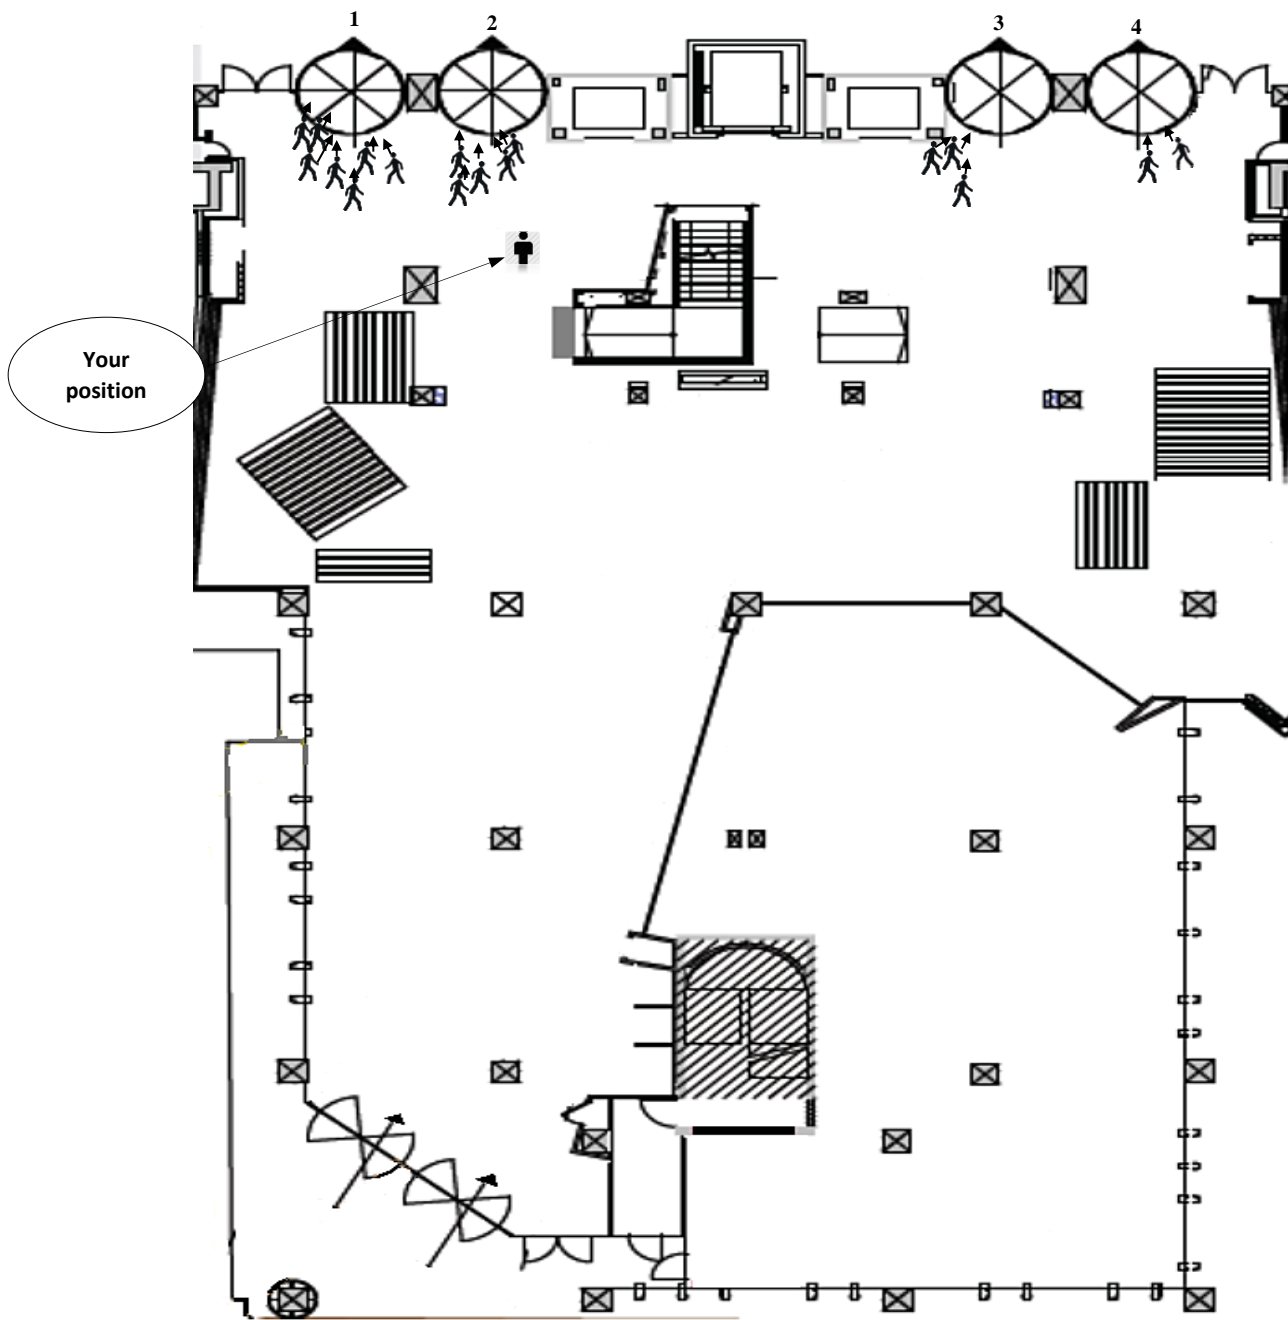

Your Choice:

Exit 1

Exit 2

Exit 3

Exit 4

### Scenario 13

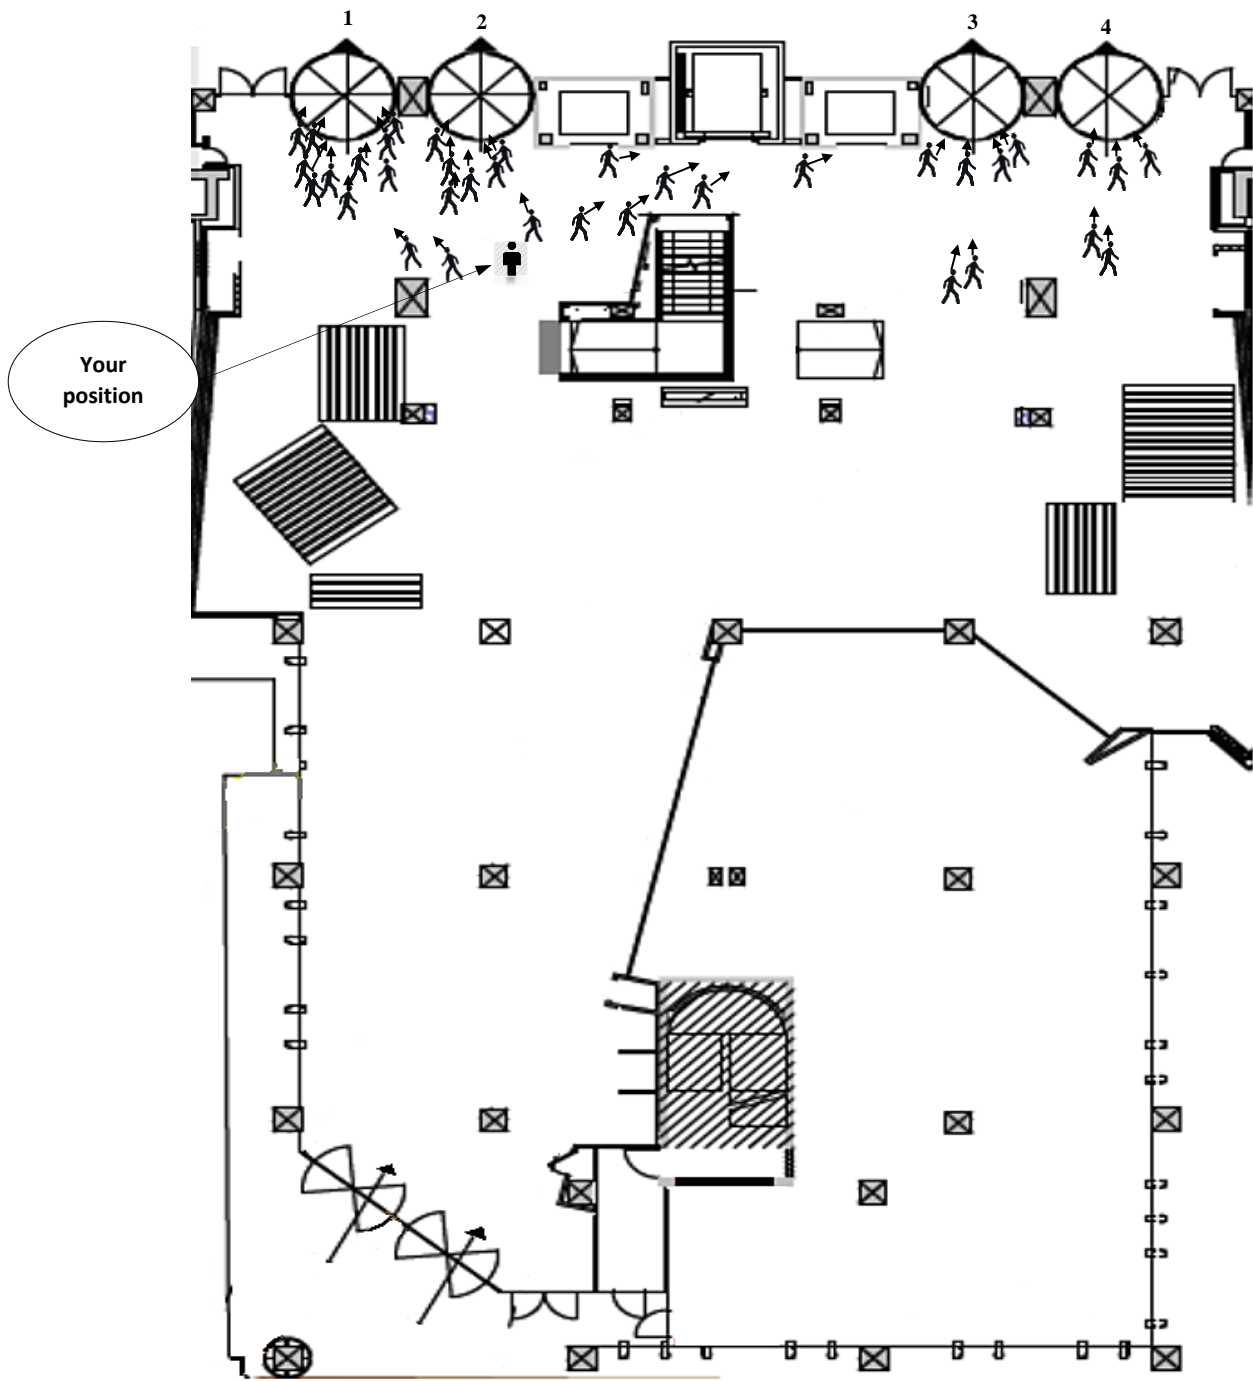

Your Choice:

Exit 1

Exit 2

Exit 3

Exit 4

### Scenario 14

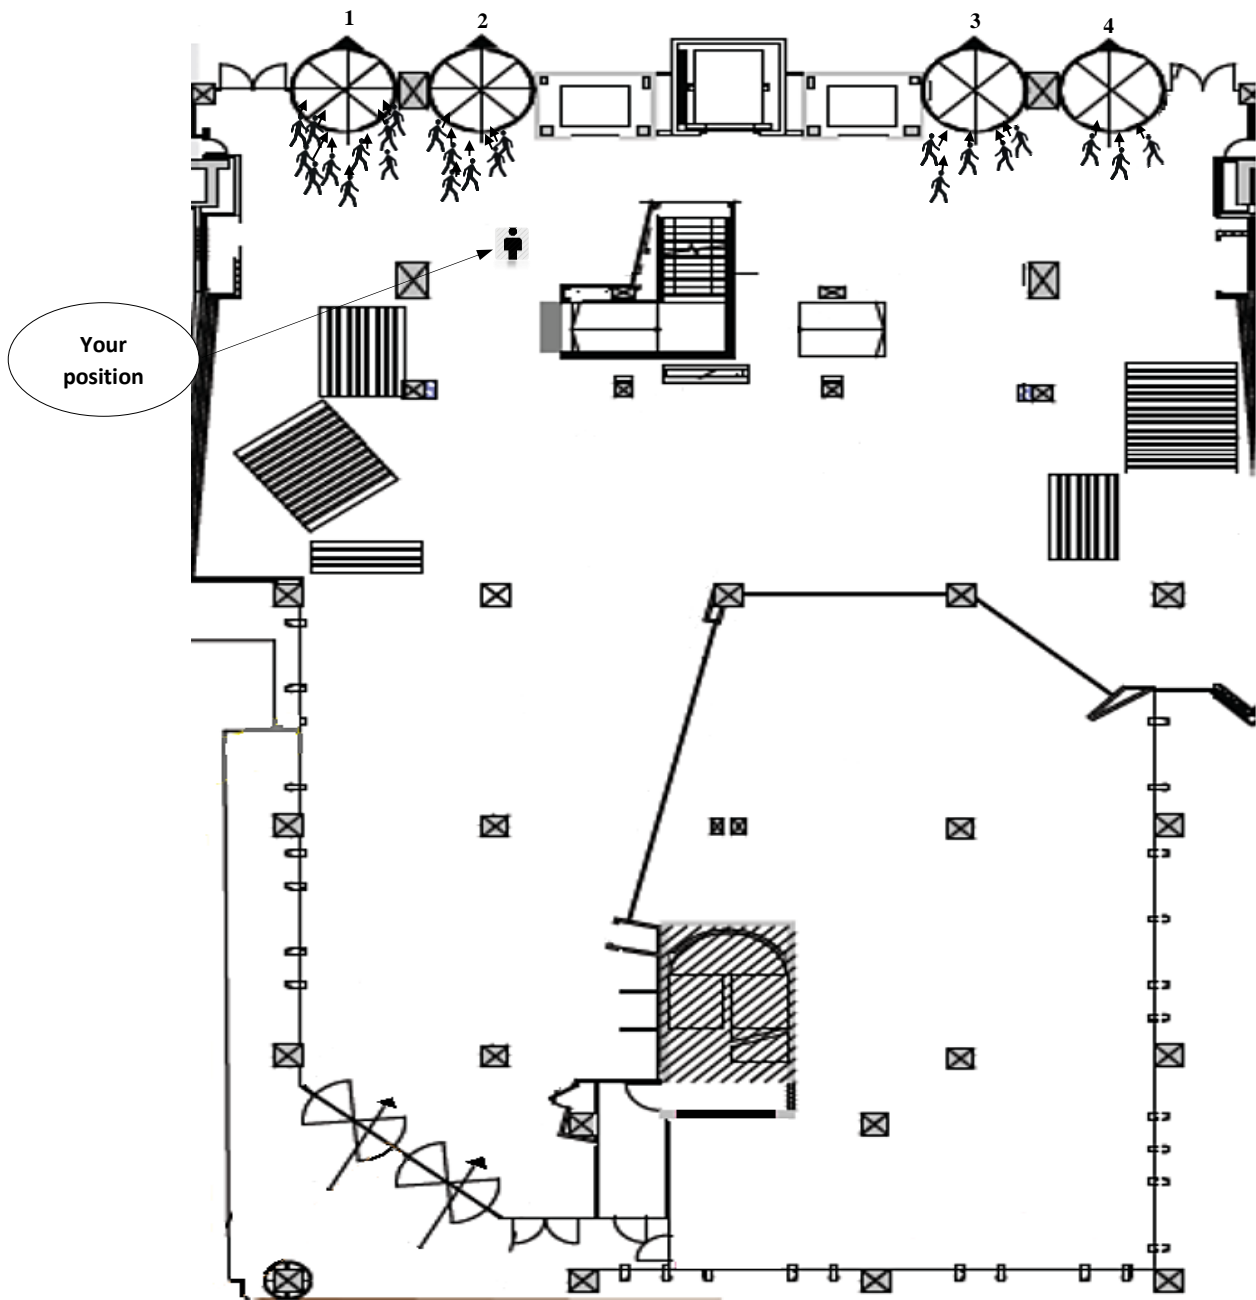

Your Choice:

Exit 1

Exit 2

Exit 3

Exit 4

SC (I) scenarios - Block (II)

Scenario 1

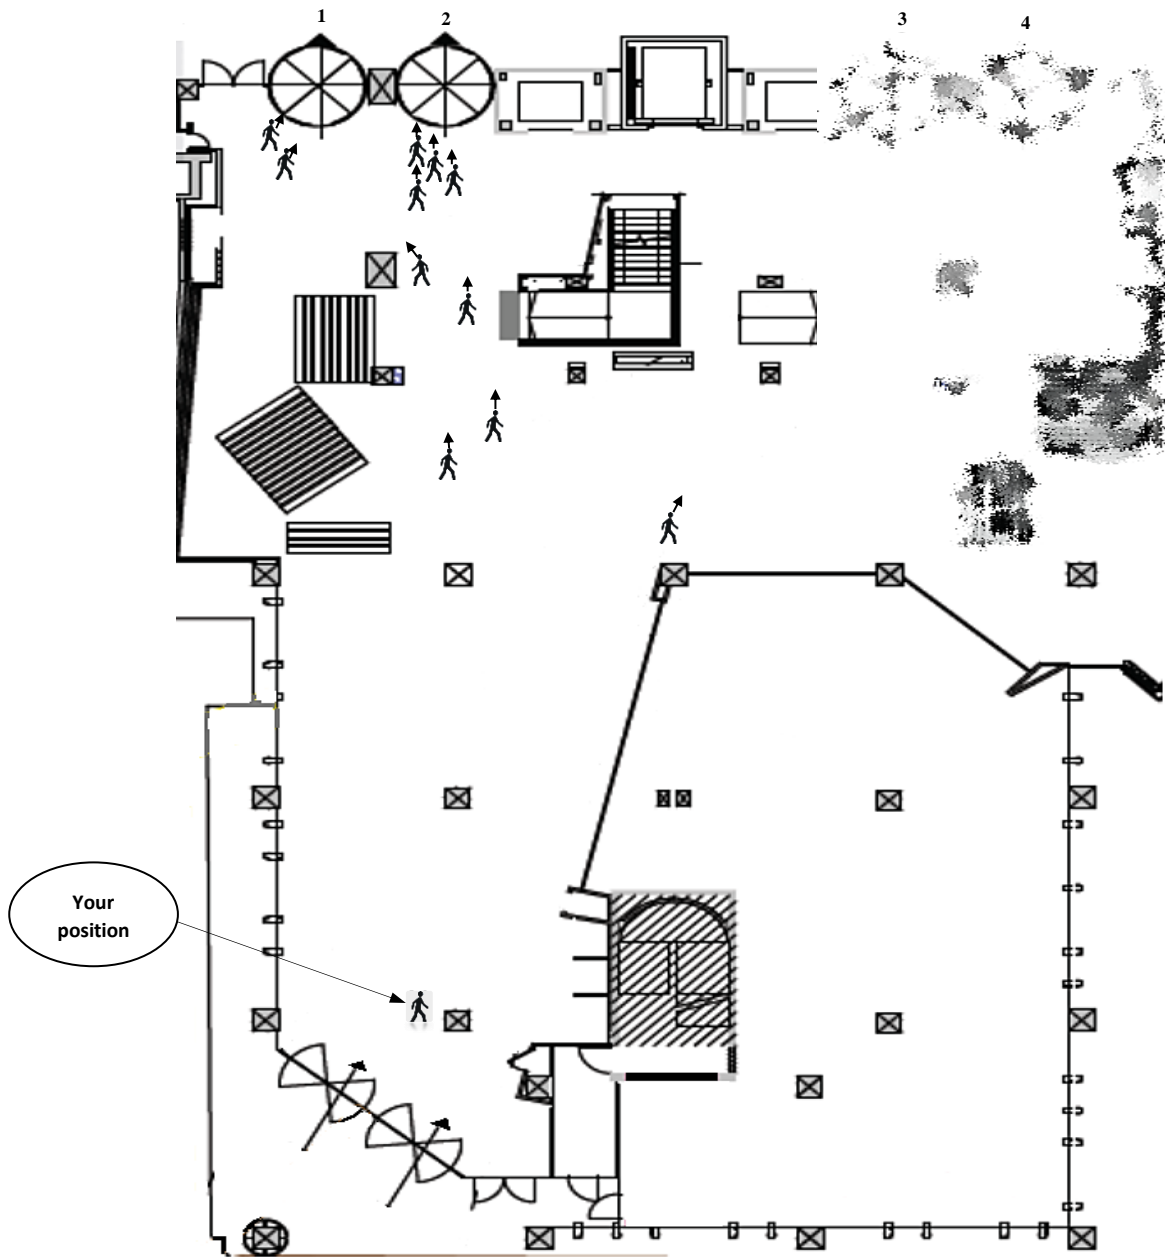

Your Choice:

Exit 1

Exit 2

Exit 3

Exit 4

## Scenario 2

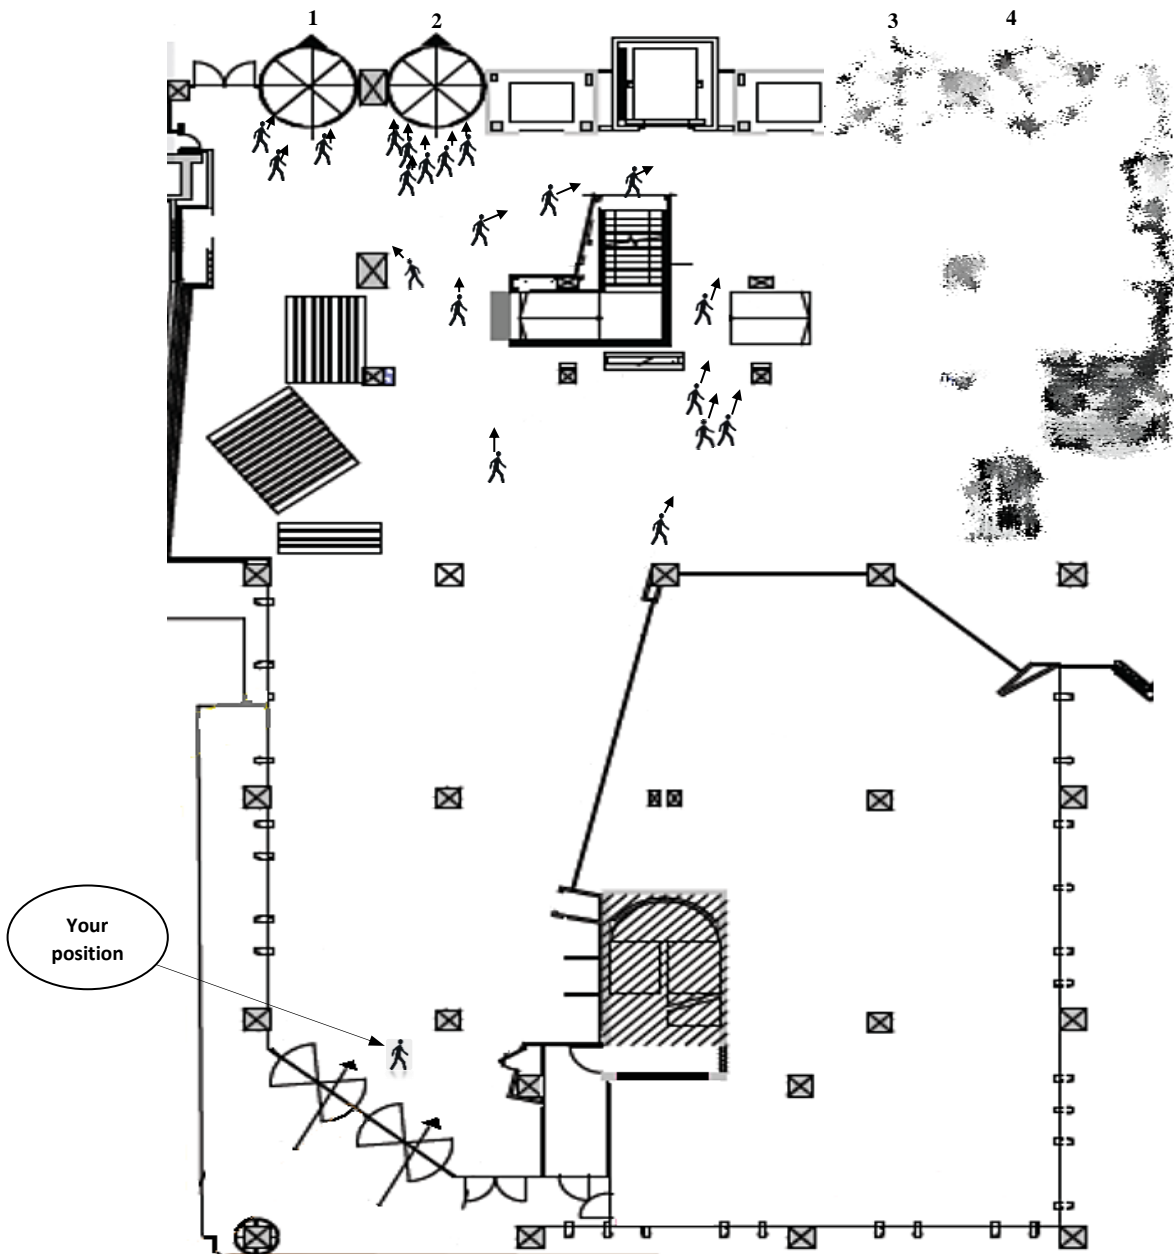

Your Choice:

Exit 1

Exit 2

Exit 3

Exit 4



### Scenario 3

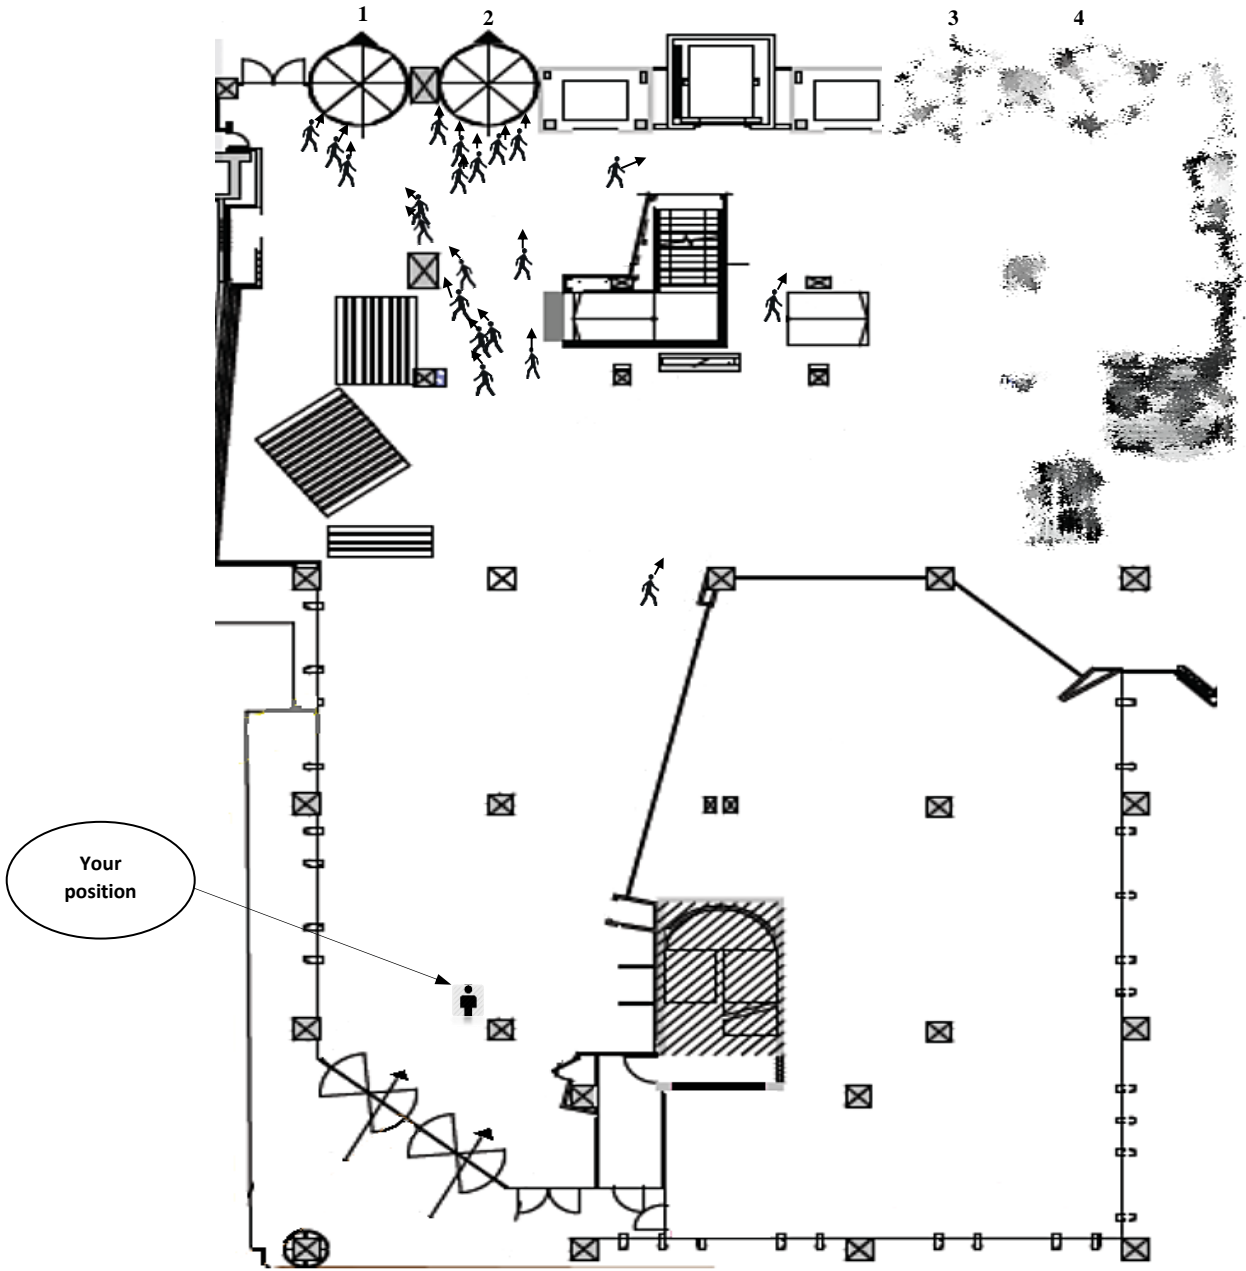

Your Choice:

Exit 1

Exit 2

Exit 3

Exit 4



### Scenario 5

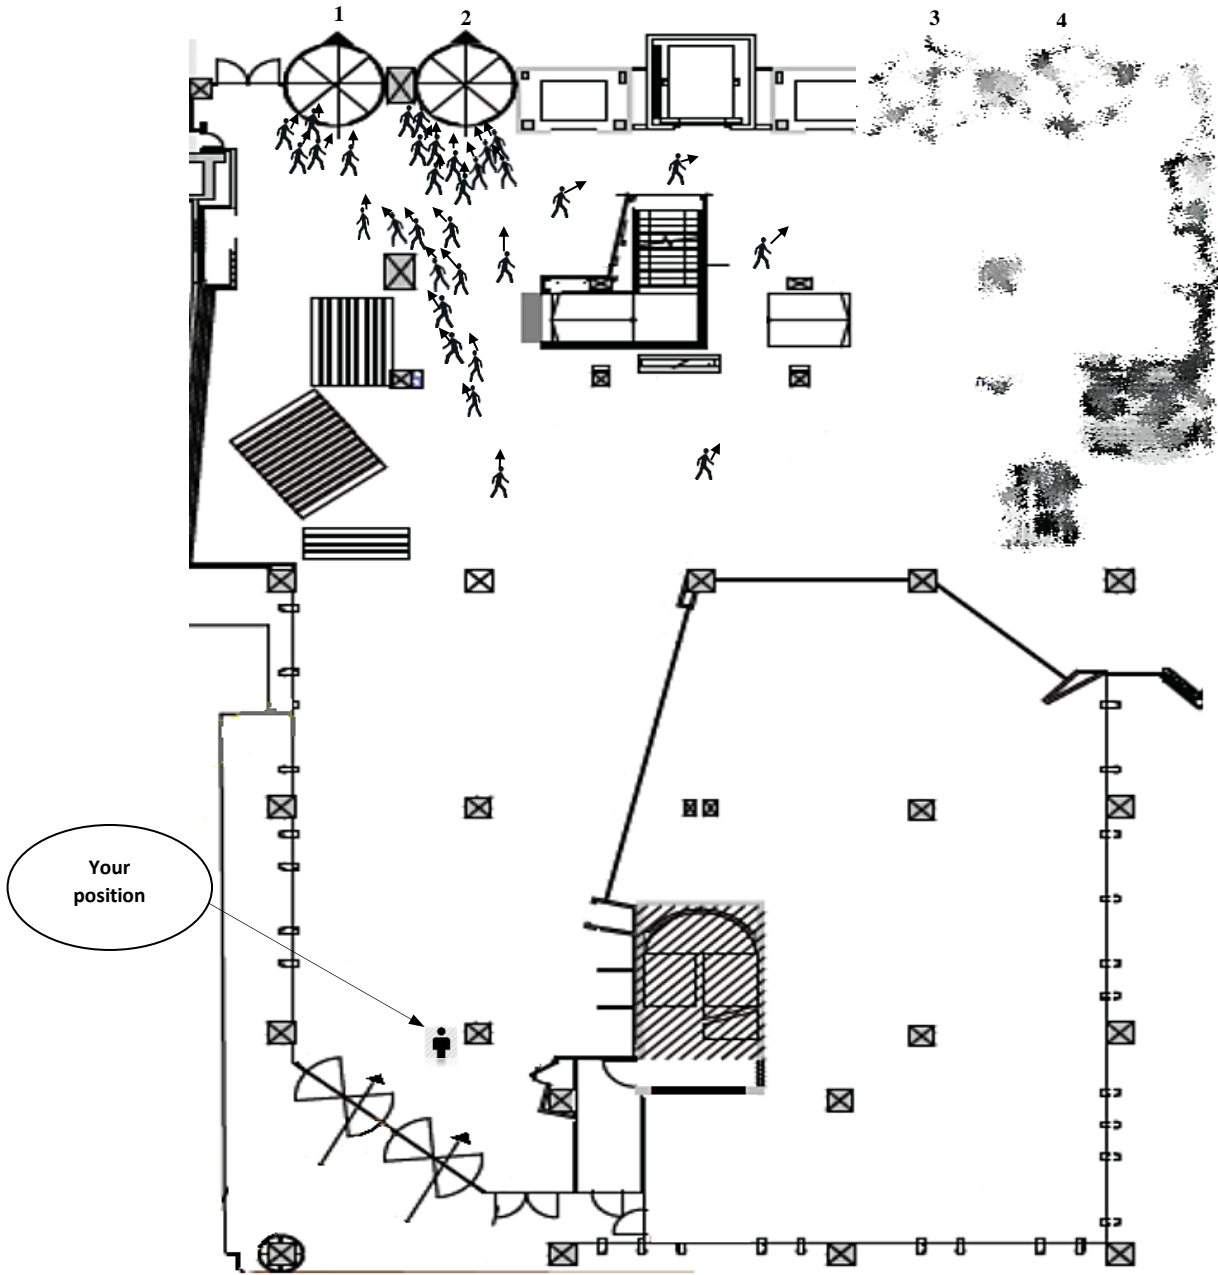

Your Choice:

Exit 1

Exit 2

Exit 3

Exit 4

### Scenario 6

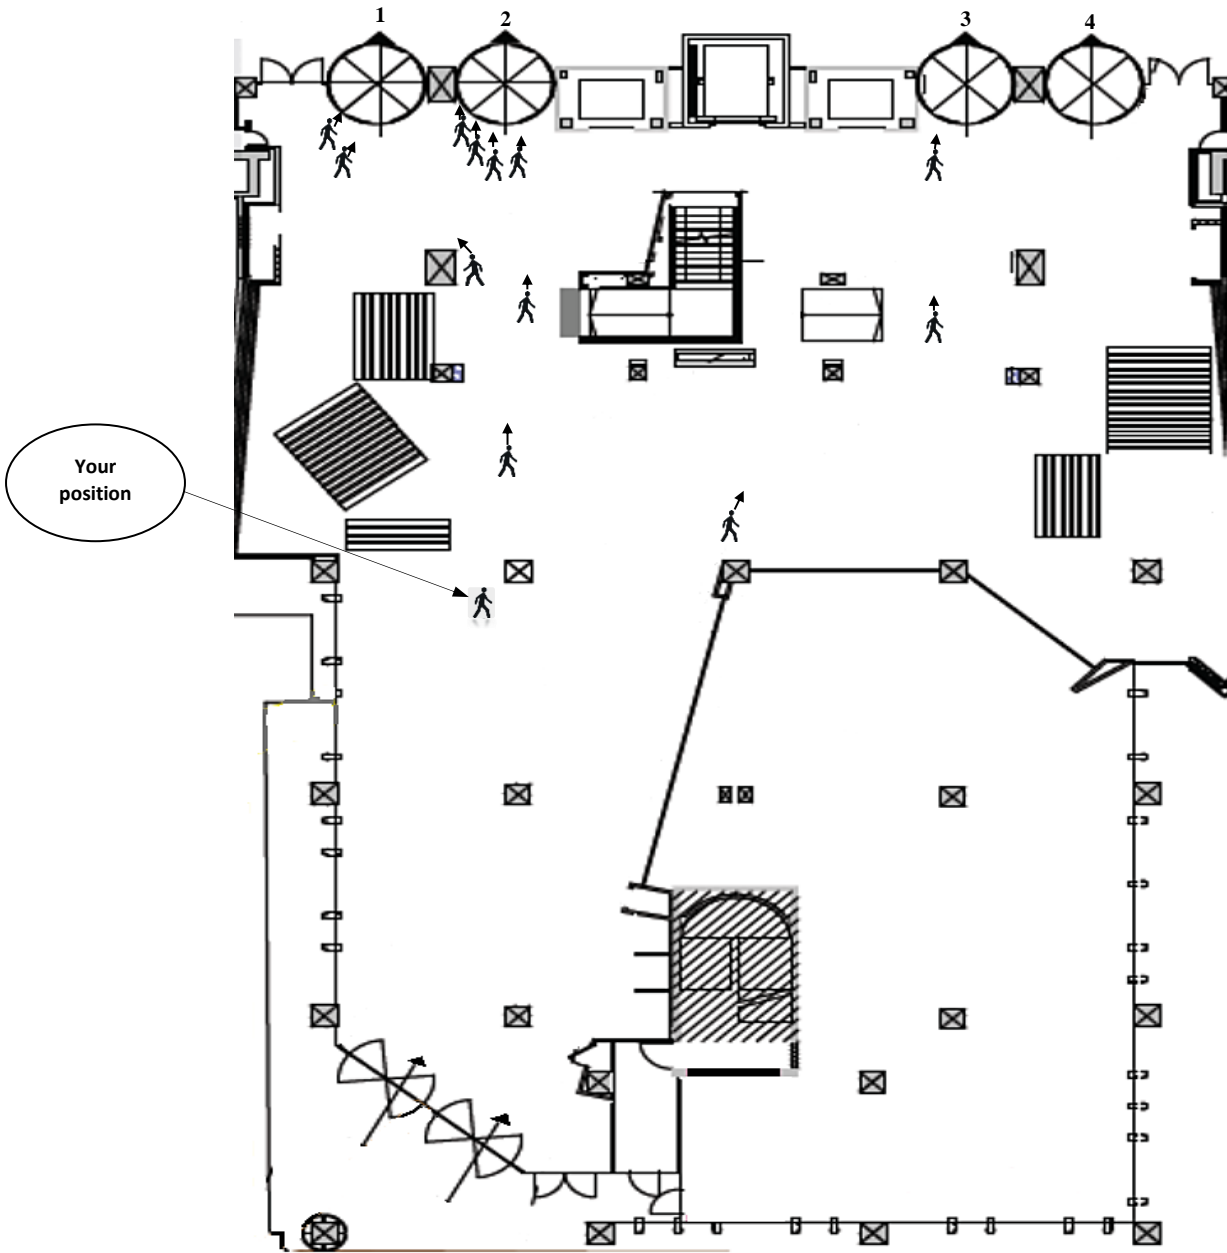

Your Choice:

Exit 1

Exit 2

Exit 3

Exit 4

### Scenario 7

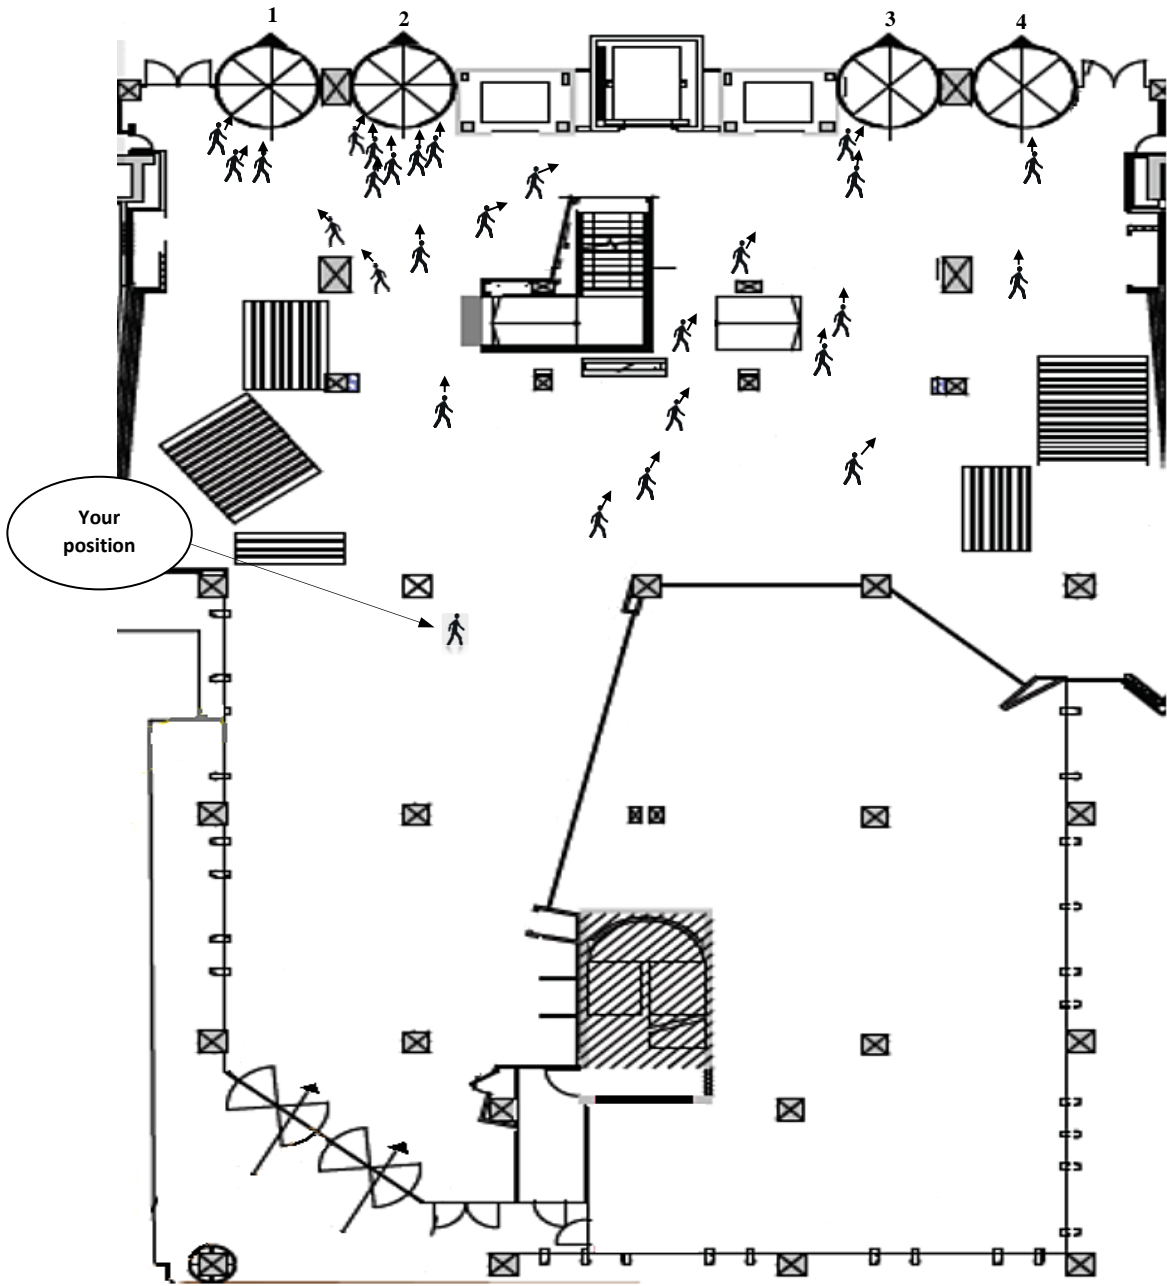

Your Choice:

Exit 1

Exit 2

Exit 3

Exit 4

### Scenario 8

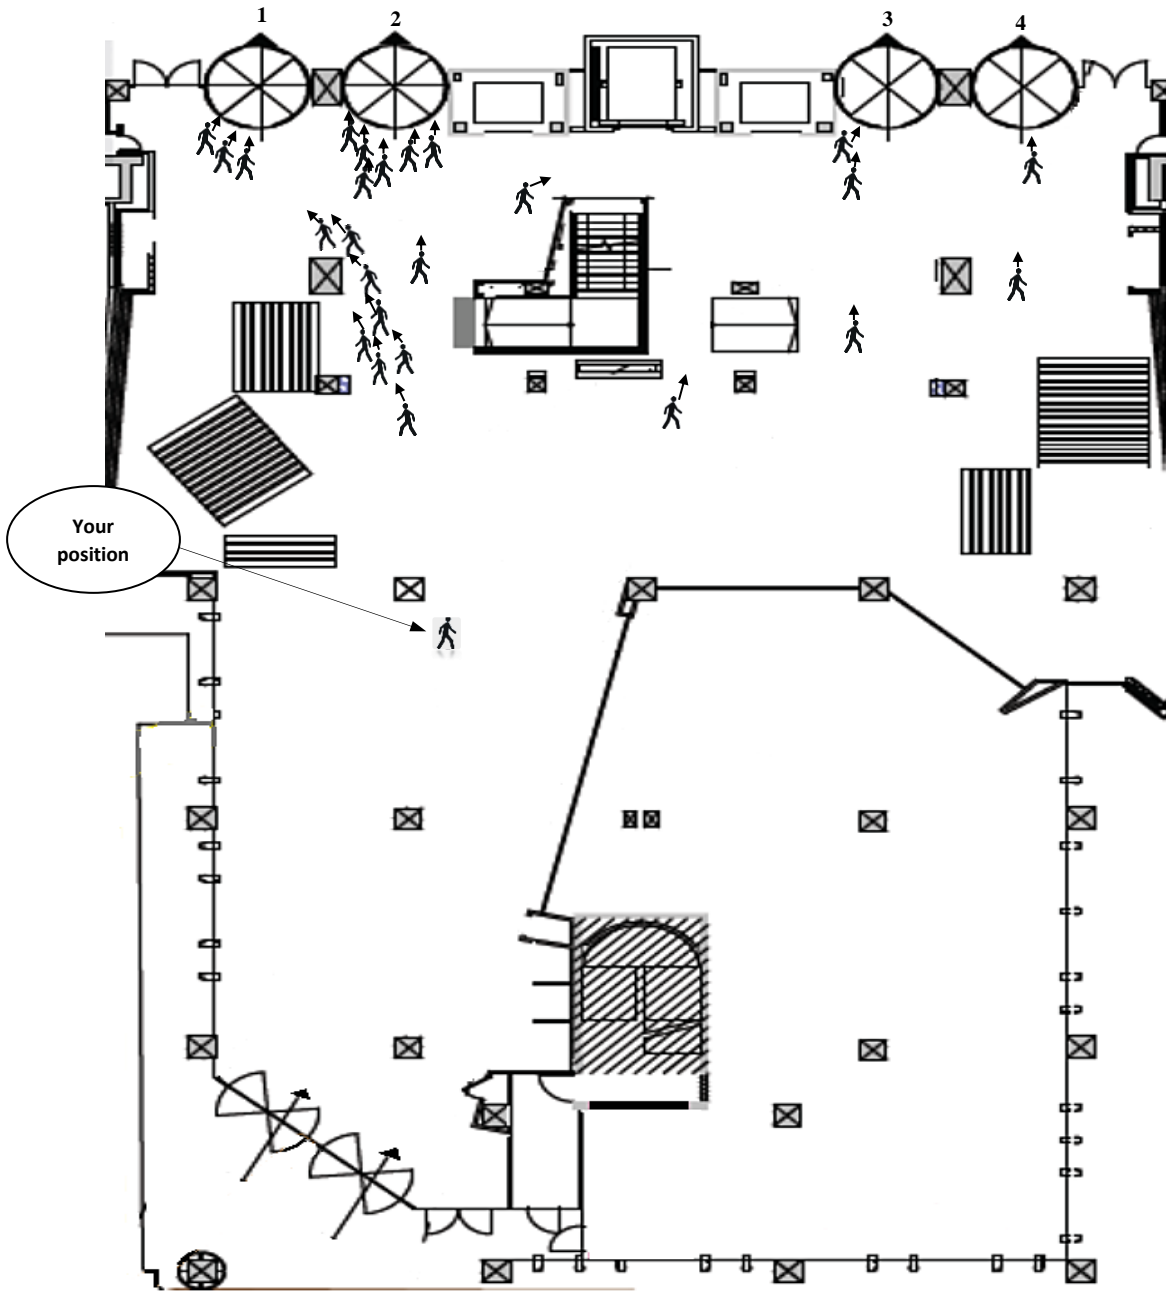

Your Choice:

Exit 1

Exit 2

Exit 3

Exit 4

### Scenario 9

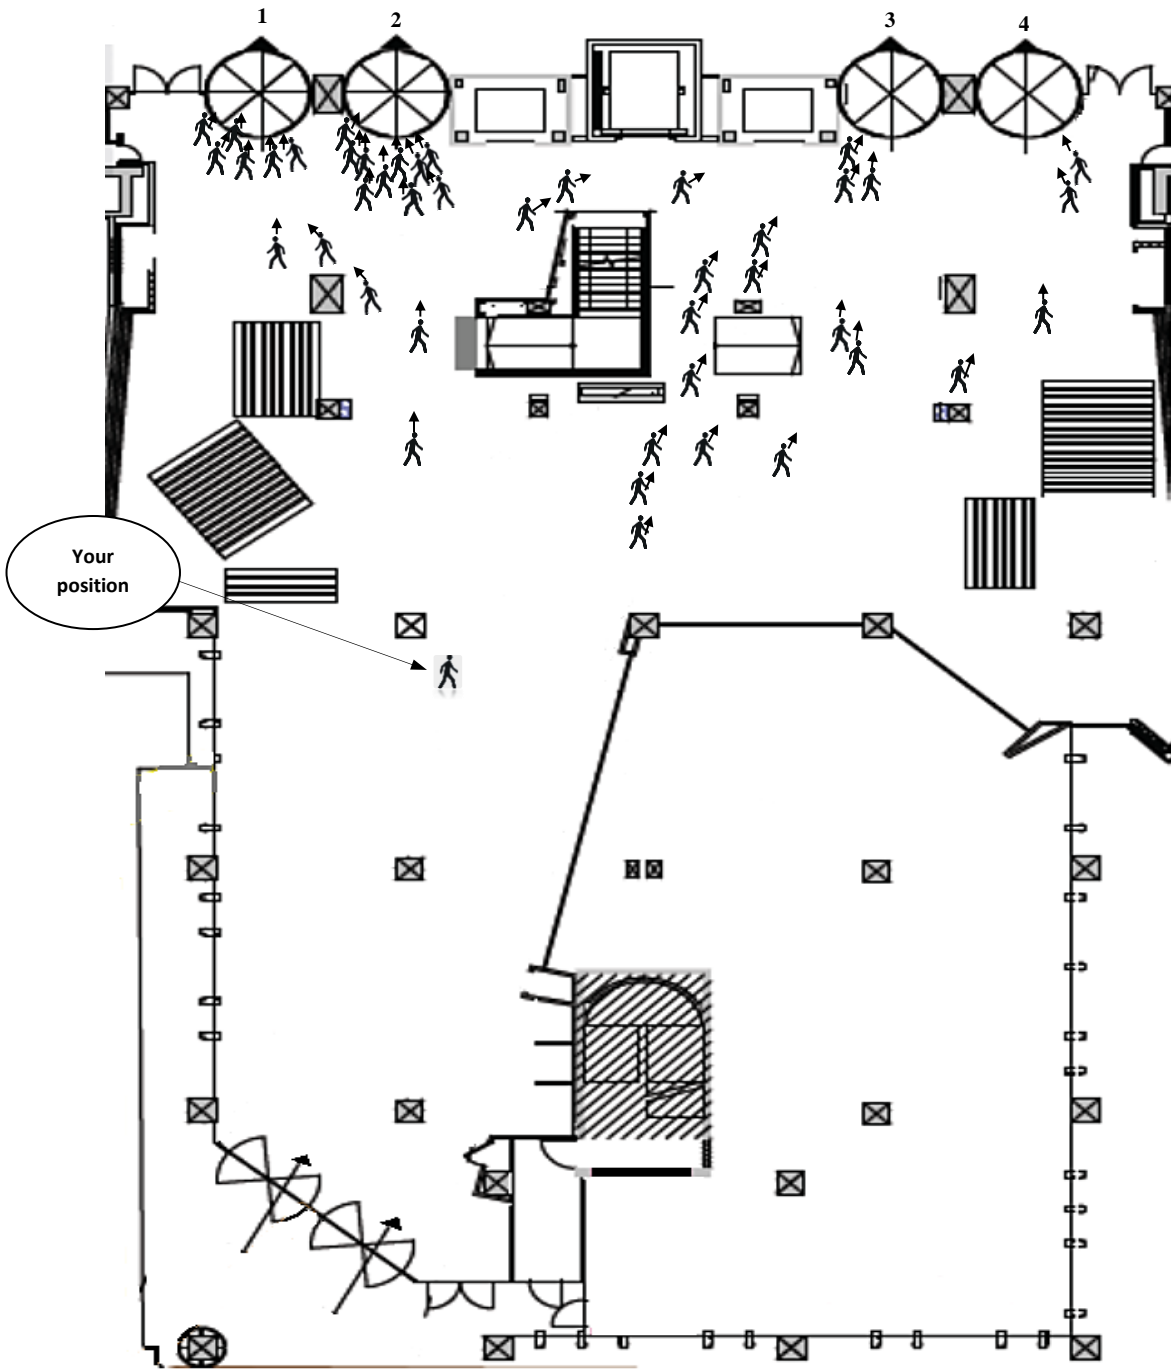

Your Choice:

Exit 1

Exit 2

Exit 3

Exit 4

### Scenario 10

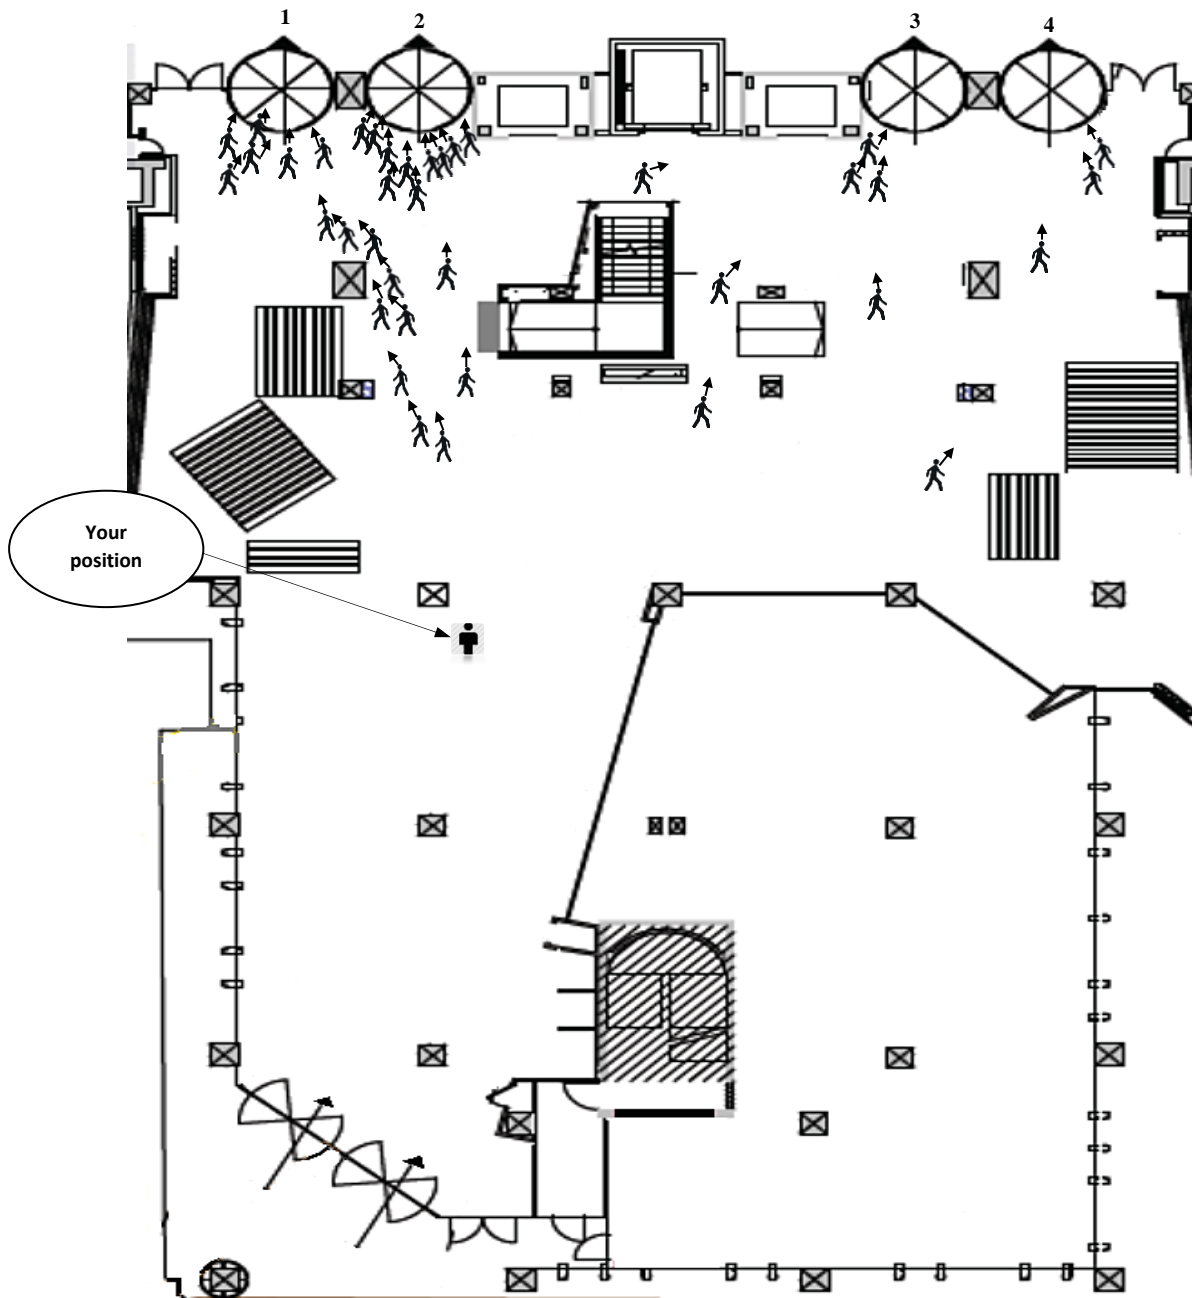

Your Choice:

Exit 1

Exit 2

Exit 3

Exit 4



### Scenario 11

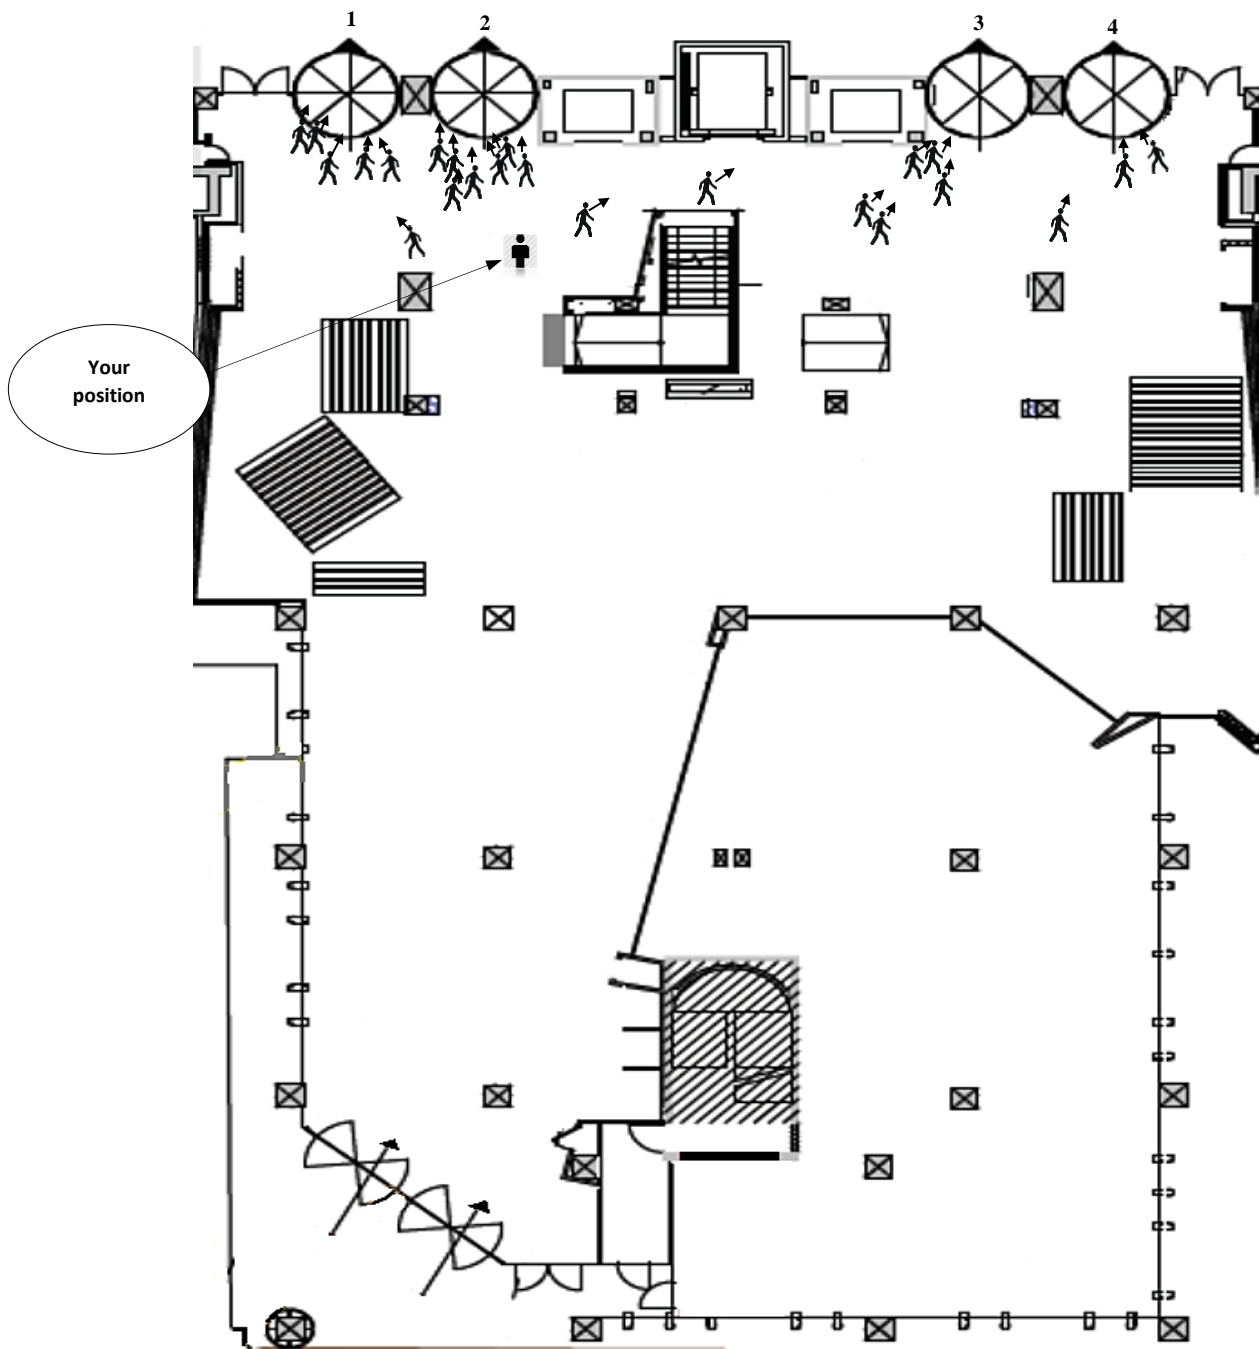

Your Choice:

Exit 1

Exit 2

Exit 3

Exit 4

### Scenario 12

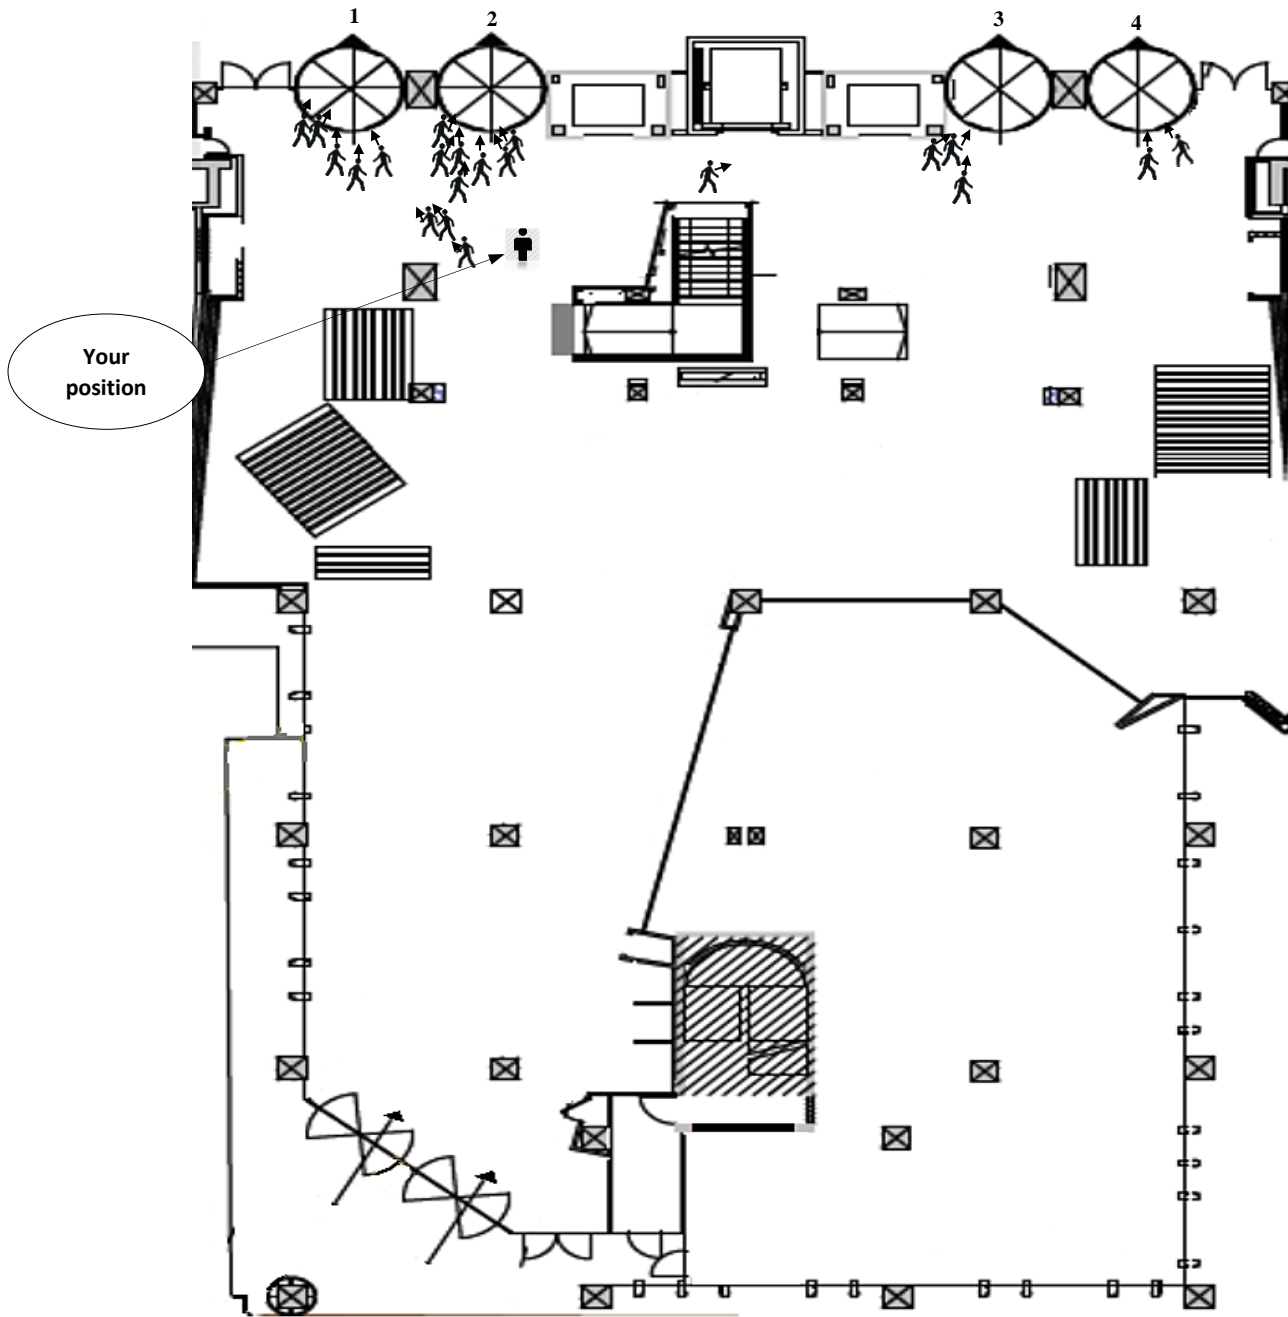

Your Choice:

Exit 1

Exit 2

Exit 3

Exit 4

### Scenario 13

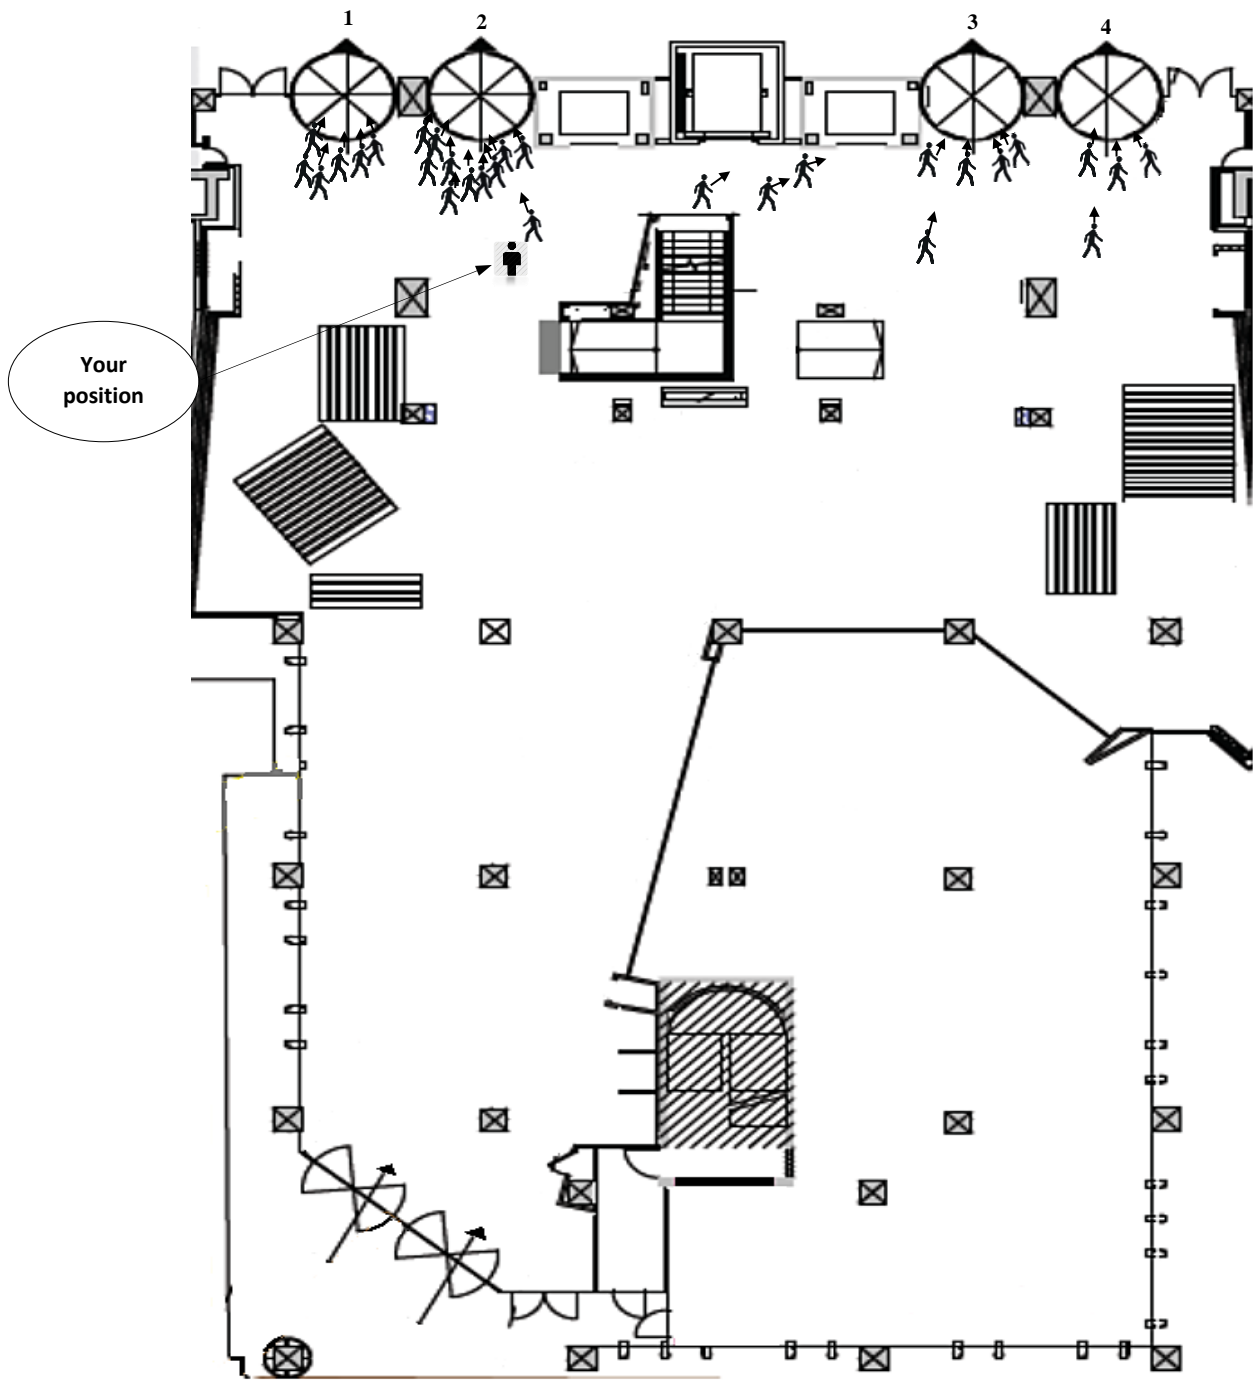

Your Choice:

Exit 1

Exit 2

Exit 3

Exit 4

### Scenario 14

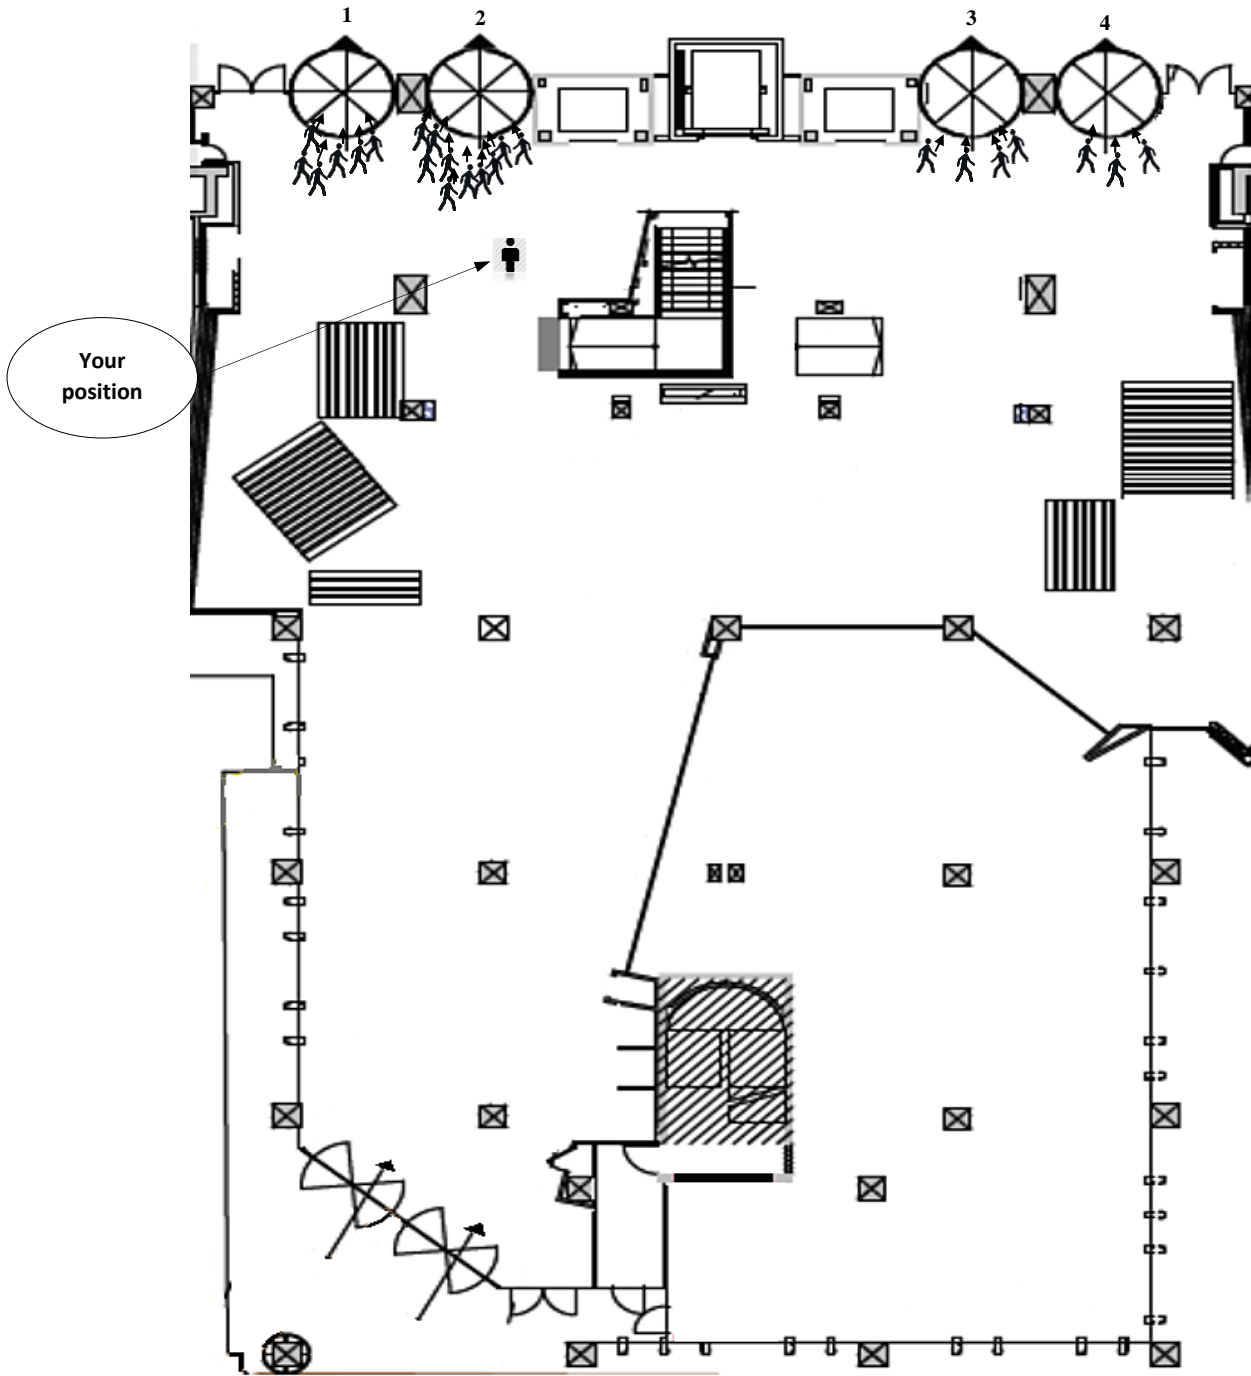

Your Choice:

Exit 1

Exit 2

Exit 3

Exit 4
