# Supplementary material for: How Simple Hypothetical-Choice Experiments Can Be Utilized to Learn Humans’ Navigational Escape Decisions in Emergencies
Source: PubMed Central journal article supplement (PMC5117746; doi:10.1371/journal.pone.0166908), 2016-11-21
Supplement: pone.0166908.s002.pdf [file pone.0166908.s002.pdf]

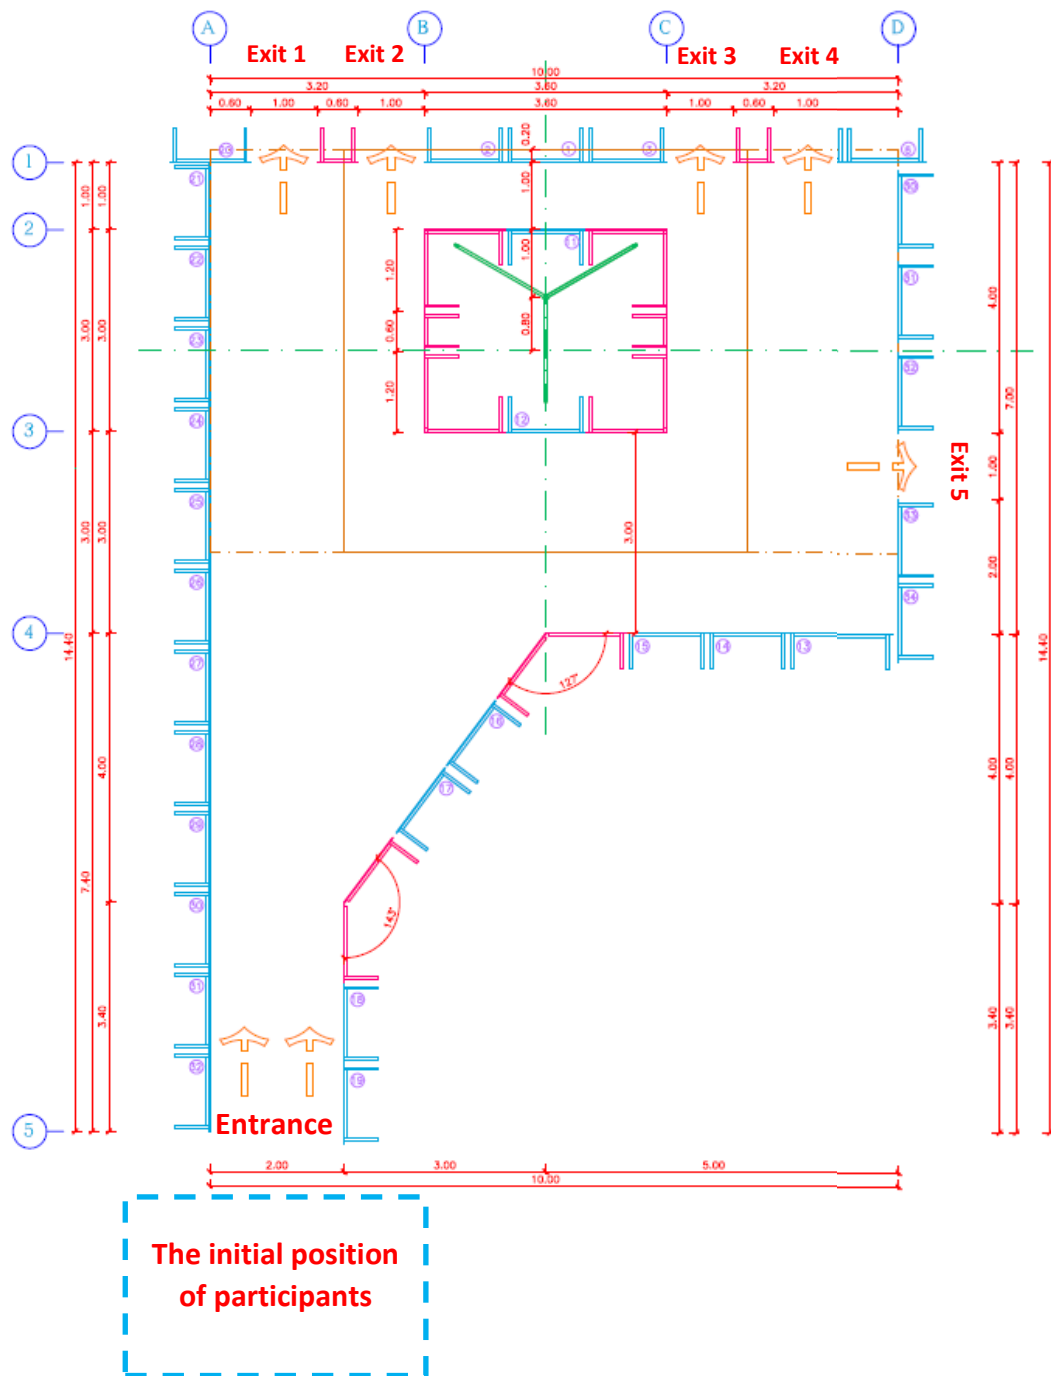

The general map of the evacuation room built for mock evacuation experiments. In total, 5 exits were built, but for each trial run only a subset of them were available to the participants. The location of the tripod legs used for mounting the camera has also been shown in green line inside the obstacle area.
